# Supplementary material for: The first enantioselective synthesis of palinurin
Source: Royal Society of Chemistry journal article supplement (doi:10.1039/b822679b), 2009-01-01

## **SUPPORTING INFORMATION FOR**

### **The first enantioselective synthesis of Palinurin**

Manuel Pérez,<sup>a</sup> Daniel I. Pérez,<sup>c</sup> Ana Martínez,<sup>b</sup> Ana Castro,<sup>c</sup> Generosa Gómez<sup>a,\*</sup> and Yagamare Fall<sup>a,\*</sup>

<sup>a</sup> *Departamento de Química Orgánica, Facultad de Química, Universidade de Vigo, 36200 Vigo, Spain.*

<sup>b</sup> *NOSCIRA, S.A., Avda, de la Industria 52, 28760 Madrid. Present address: Instituto de Química Médica (CSIC), Juan de la Cierva 3, 28006 Madrid, Spain.*

<sup>c</sup> *NOSCIRA, S.A. Avda, de la Industria 52, 28760 Madrid*

*ggomez@uvigo.es; yagamare@uvigo.es*

### **Table of Contents**

Index

Experimental details.....2-20

<sup>1</sup>H and <sup>13</sup>C NMR Spectra.....21-48

## Experimental Procedures

**General:** Melting points were obtained in open capillary tubes and are not corrected.  $^1\text{H}$ - and  $^{13}\text{C}$ -NMR spectra were recorded in  $\text{CDCl}_3$  at 400 and 100 MHz, respectively. All reactions were monitored by thin layer chromatography that was performed on precoated sheets of silica gel 60, and flash column chromatography was done with silica gel 60 (230-400 mesh) of Merck. Eluting solvents are indicated in the text.

### Compound 8

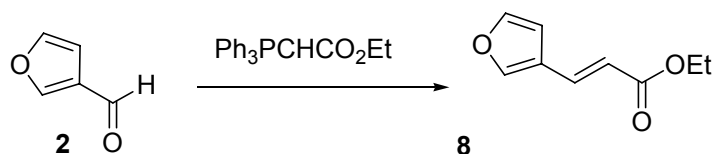

To a solution of aldehyde **2** (10.1 g, 104.7 mmol) in THF (280 mL) was added  $\text{Ph}_3\text{PCHCO}_2\text{Et}$  (40.2 g, 115.3 mmol) and the mixture refluxed for 2 h and allowed to reach room temperature. The solvent was removed and the residue was purified by column chromatography on silica gel using 30% EtOAc /Hexane as eluent, to afford ester **8** (17.3g, 99%) as a white solid; m.p. = 38-40 °C,  $R_f$  = 0.6 (50% EtOAc /Hexane).

$^1\text{H-NMR}$  ( $\text{CDCl}_3$ ,  $\delta$ ): 7.58 (1H, s, CH); 7.50 (1H, d,  $J$  = 15,8 Hz, CH); 7.36 (1H, s, CH-2); 6.52 (1H, s, CH); 6.10 (1H, d,  $J$  = 15.8 Hz, CH); 4.18 (2H, q,  $J$  = 7.1 Hz,  $\text{CH}_2\text{-OEt}$ ); 1.25 (3H, t,  $J$  = 7.1 Hz,  $\text{CH}_3\text{-OEt}$ ).

$^{13}\text{C-NMR}$  ( $\text{CDCl}_3$ ,  $\delta$ ): 166.8 (C=O); 144.3 (CH); 114.3 (CH); 134.4 (CH); 122.5 (C); 117.9 (CH); 107.3 (CH); 60.2 ( $\text{CH}_2\text{-OEt}$ ); 14.2 ( $\text{CH}_3\text{-OEt}$ ).

**IR (film):**  $\nu$  = 1710, 1610  $\text{cm}^{-1}$

**MS ( $\text{EI}^+$ ) [ $m/z$ , (%)]:** 166.06 ( $[\text{M}]^+$ , 67); 121.03 ( $[\text{M-OEt}]^+$ , 100); 93.03 (30); 64.99 (28).

**HRMS ( $\text{EI}^+$ ):** Calcd. For  $\text{C}_9\text{H}_{10}\text{O}_3$  166.0630, found 166.0632.

### Compound 9

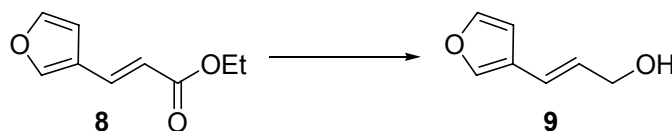

To a solution of ester **8** (17.3 g, 104 mmol) in Et<sub>2</sub>O (61 mL) at 0°C was added portionwise LiAlH<sub>4</sub> (11.9 g, 313 mmol). At the end of the addition the cooling bath was removed and the mixture stirred at room temperature for 1 h. The reaction was quenched with drops of H<sub>2</sub>O at 0°C and stirred for 30 mn. Na<sub>2</sub>SO<sub>4</sub> was added and the solids removed by filtration. The filtrate was concentrated under reduced pressure affording virtually pure allylic alcohol **9** (12.3 g, 95%) as a yellowish liquid; R<sub>f</sub> = 0,31 (50% EtOAc /Hexane).

**<sup>1</sup>H-NMR (CDCl<sub>3</sub>, δ):** 7.40 (1H, s, CH); 7.35 (1H, s, CH); 6.51 (1H, s, CH); 6.46 (1H, d, *J*= 15.9 Hz, CH); 6.09 (1H, td, *J*= 13.8 Hz, *J*= 5.9 Hz, CH); 4.25 (2H, d, *J*= 5.9 Hz, CH<sub>2</sub>).

**<sup>13</sup>C-NMR (CDCl<sub>3</sub>, δ):** 143.6 (CH); 140.5 (CH); 128.1 (CH); 123.6 (C); 121.2 (CH); 107.5 (CH); 63.6 (CH<sub>2</sub>).

**IR (film):** ν = 3365 (br) cm<sup>-1</sup>

**MS (EI<sup>+</sup>) [m/z, (%):** 124.13 ([M]<sup>+</sup>, 4); 123.12 ([M-1]<sup>+</sup>, 9); 97.10 (22); 83.07 (26); 81.06 (36); 71.05 (32); 69.03 (68); 68.96 ([M-C<sub>3</sub>H<sub>3</sub>O]<sup>+</sup>, 100).

**HRMS (EI<sup>+</sup>):** Calcd. For C<sub>7</sub>H<sub>8</sub>O<sub>2</sub> 123.0810, found 123.0802.

### Compound 10

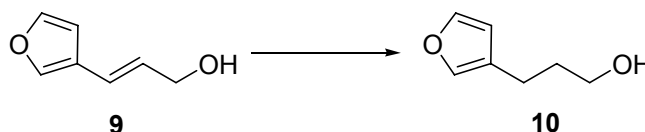

A suspension of allylic alcohol **9** (4.1 g, 33 mmol) and Pd/C (10%) (0.32 g, 0.3 mmol) in MeOH (30 mL) was vigorously stirred under H<sub>2</sub> atmosphere for 7 h. At the end of the reaction (TLC), the mixture was filtered through celite and the filtrate was concentrated under reduced pressure affording virtually pure alcohol **10** (4.1 g, 98%) as a colorless oil, R<sub>f</sub> = 0,31 (50% EtOAc /Hexane).

**<sup>1</sup>H-NMR (CDCl<sub>3</sub>, δ):** 7.34 (1H, s, CH); 7.23 (1H, s, CH); 6.27 (1H, s, CH); 3.68 (2H, t, *J*= 6.3 Hz, CH<sub>2</sub>); 2.51 (2H, t, *J*= 7.7 Hz, CH<sub>2</sub>); 1.82 (2H, q, *J*= 7.1 Hz, CH<sub>2</sub>); 1.57 (1H, br s, -OH).

**<sup>13</sup>C-NMR (CDCl<sub>3</sub>, δ):** 142.8 (CH); 138.9 (CH); 124.4 (C); 110.9 (CH); 62.3 (CH<sub>2</sub>); 32.8 (CH<sub>2</sub>); 21.0 (CH<sub>2</sub>).

**IR (film):** ν = 3350 (br) cm<sup>-1</sup>

**MS (EI<sup>+</sup>) [m/z, (%):** 126.07 ([M]<sup>+</sup>, 20); 125.06 ([M-1]<sup>+</sup>, 100); 113.06 (36); 112.05 (20); 111.05 (21); 109.7 ([M-OH]<sup>+</sup>, 15); 97.06 (20); 95.05 ([M-CH<sub>3</sub>O]<sup>+</sup>, 20); 82.03 (28); 81.02 ([M-C<sub>2</sub>H<sub>5</sub>O]<sup>+</sup>, 39); 79.04 (25); 67.02 ([M-C<sub>3</sub>H<sub>7</sub>O]<sup>+</sup>, 31).

**HRMS (EI<sup>+</sup>):** Calcd. For C<sub>7</sub>H<sub>9</sub>O<sub>2</sub> 125.0603, found 125.0607.

## Compound 11

**11** is a known compound (Mihelcic, J.; Moeller, K. D. *Journal of the American Chemical Society*, 2004, **126**, 9106.)

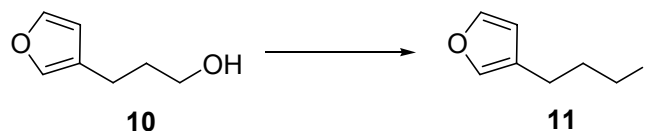

To a solution of alcohol **10** (0.87 g, 6.9 mmol) in THF (50 mL) were added PPh<sub>3</sub> (2.16 g, 8.25 mmol) and imidazole (1.4 g, 20.6 mmol) and the mixture was stirred at room temperature till complete dissolution of the reagents. It was then cooled to -20°C and I<sub>2</sub> (2.26 g, 8.9 mmol) was added. After stirring at this temperature for 15 mn, the cooling bath was removed and the mixture stirred at room temperature for 30 mn. The reaction was quenched at 0°C with an aqueous saturated solution of NaHCO<sub>3</sub> (49 mL), and the resulting white precipitate was removed by filtration. The aqueous phase was extracted with *tert*-butylmethylether (TBME) (3 x 50 mL) and the combined organic phases were washed with 10% aqueous solution of Na<sub>2</sub>SO<sub>3</sub> (150 mL) and H<sub>2</sub>O (150 mL), dried over Na<sub>2</sub>SO<sub>3</sub>, filtered and the solvent evaporated to give a residue which was chromatographed on silica gel using dichloromethane as eluent, affording iodide **11** (1.3 g, 80%) as a yellow oil; R<sub>f</sub> = 0,80 (50% EtOAc /Hexane).

<sup>1</sup>H-NMR (CDCl<sub>3</sub>, δ): 7.35 (1H, t, *J*= 1.5 Hz, CH); 7.25 (1H, s, CH); 6.26 (1H, s, CH); 3.18 (2H, t, *J*= 6.7 Hz, CH<sub>2</sub>); 2.54 (2H, t, *J*= 7.2 Hz, CH<sub>2</sub>); 1.08 (2H, q, *J*= 6.9 Hz, CH<sub>2</sub>)  
<sup>13</sup>C-NMR (CDCl<sub>3</sub>, δ): 143.0 (CH); 139.3 (CH); 123.0 (C); 110.8 (CH); 33.4 (CH<sub>2</sub>); 25.3 (CH<sub>2</sub>); 6.3 (CH<sub>2</sub>).

MS(FAB<sup>+</sup>) [*m/z*, (%)]: 235.98 ([M]<sup>+</sup>, 36); 221.11 (37); 219.17 (26); 217.16 (21); 207.11 (34); 205.17 (28); 203.17 (27); 202.17 (20); 193.17 (29); 191.18 (40); 181.18 (28); 177.22 (36); 169.12 (35); 167.20 (40); 165.22 (65); 163.25 (54); 161.24 (47); 159.23 (52); 155.22(64); 154.20 (100); 151.33 (43); 151.17 (50); 151.07 (54).

HRMS (EI<sup>+</sup>): Calcd. For C<sub>7</sub>H<sub>9</sub>OI 235.9698, found 235.9759.

## Compound 12

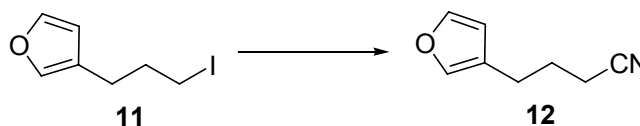

To a solution of iodide **11** (1.1 g, 4.6 mmol) in DMSO (12 mL) was added NaCN (324 mg, 6.5 mmol) and the mixture was stirred at 90°C for 1 h and allowed to reach room temperature. H<sub>2</sub>O (50 mL) was added and the product extracted with TBME (3 x 50 mL). The combined organic phases were dried, filtered and evaporated to afford



virtually pure nitrile **12** (625 mg, 99%) as a colorless liquid;  $R_f = 0,70$  (50% EtOAc /Hexane).

**$^1\text{H-NMR}$  ( $\text{CDCl}_3$ ,  $\delta$ ):** 7.37 (1H, t,  $J = 1.7$  Hz, CH); 7.26 (1H, dd,  $J = 1.6$  Hz,  $J = 0.9$  Hz, CH); 6.25 (1H, s, CH-2); 2.60 (2H, t,  $J = 7.3$  Hz,  $\text{CH}_2$ ); 2.33 (2H, t,  $J = 7.1$  Hz,  $\text{CH}_2$ ); 1.91 (2H, q,  $J = 7.3$  Hz,  $\text{CH}_2$ )

**$^{13}\text{C-NMR}$  ( $\text{CDCl}_3$ ,  $\delta$ ):** 134.3 (CH); 139.4 (CH); 122.5 (C); 119.4 (C); 110.5 (CH); 25.7 ( $\text{CH}_2$ ); 23.5 ( $\text{CH}_2$ ); 16.4 ( $\text{CH}_2$ )

**IR (film):**  $\nu = 2258 \text{ cm}^{-1}$

**MS ( $\text{EI}^+$ ) [ $m/z$ , (%)]:** 135.07 ( $[\text{M}]^+$ , 29); 95.05 ( $[\text{M}-\text{C}_2\text{H}_2\text{N}]^+$ , 5); 82.04 (30); 81.03 ( $[\text{M}-\text{C}_3\text{H}_4\text{N}]^+$ , 100).

**HRMS ( $\text{EI}^+$ ):** Calcd. For  $\text{C}_8\text{H}_9\text{NO}$  135.0684, found 135.0685.

### Compound 3

**3** is a known compound ( W. H. Miles, C. J. Berreth, P. M. Smiley, *Tetrahedron Lett.* 1993, **34**, 5221)

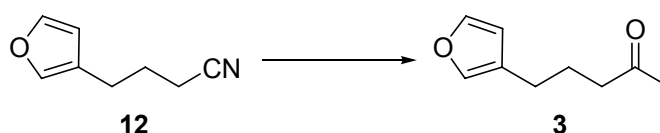

To a solution of nitrile **12** (3.58 g, 25.8 mmol) in  $\text{Et}_2\text{O}$  (60 mL) at  $0^\circ\text{C}$  was added MeLi (51.6 mL of a 1.5M solution in  $\text{Et}_2\text{O}$ , 77.46 mmol) and the mixture was stirred for 30 mn. The reaction was quenched by adding an aqueous saturated solution of  $\text{NH}_4\text{Cl}$  and the product extracted with EtOAc (3 x 50 mL). The combined organic phases were washed with an aqueous saturated solution of  $\text{NaHCO}_3$  (100 mL), dried, filtered and evaporated to give a residue which was chromatographed on silica gel using 5% EtOAc /Hexane as eluent, affording ketone **3** (3.92 g, 80%) as a colorless liquid;  $R_f = 0,65$  (50% EtOAc/Hexane).

**$^1\text{H-NMR}$  ( $\text{CDCl}_3$ ,  $\delta$ ):** 7.32 (1H, s, CH); 7.18 (1H, s, CH); 6.23 (1H, s, CH); 2.40 (4H, c,  $J = 7.1$  Hz,  $\text{CH}_2$ -3,  $\text{CH}_2$ ); 2.09 (3H, s,  $\text{CH}_3$ ); 1.80 (2H, q,  $J = 7.4$  Hz,  $\text{CH}_2$ ).

**$^{13}\text{C-NMR}$  ( $\text{CDCl}_3$ ,  $\delta$ ):** 208.6 (C=O); 142.8 (CH); 138.9 (CH); 124.2 (C); 110.8 (CH); 42.8 ( $\text{CH}_2$ ); 29.9 ( $\text{CH}_3$ ); 23.9 ( $\text{CH}_2$ ); 23.8 ( $\text{CH}_2$ ).

**IR (film):**  $\nu = 1720 \text{ cm}^{-1}$

**MS ( $\text{EI}^+$ ) [ $m/z$ , (%)]:** 152.08 ( $[\text{M}]^+$ , 6); 134.07 ( $[\text{M}-\text{H}_2\text{O}]^+$ , 12); 94.04 ( $[\text{M}-\text{C}_3\text{H}_6\text{O}]^+$ , 100).

**HRMS ( $\text{EI}^+$ ):** Calcd. For  $\text{C}_9\text{H}_{12}\text{O}_2$  152.0837, found 152.0832.

## Compound 14

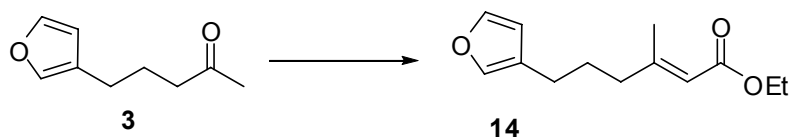

To a mixture of NaH (2.8 g, 70.8 mmol) in THF (70 mL) at 0°C was added (EtO)<sub>2</sub>P(O)CH<sub>2</sub>CO<sub>2</sub>Et (16.5 mL, 82.9 mmol). The cooling bath was then removed and the mixture stirred at room temperature for 18 h. A solution of ketone **3** (1.8 g, 11.8 mmol) in THF (10 mL) was added and stirring was continued at room temperature for 24 h. The reaction was quenched with an aqueous saturated solution of NH<sub>4</sub>Cl and the product extracted with EtOAc (3 x 100 mL). The combined organic phases were dried, filtered and evaporated to give a residue which was chromatographed on silica gel using 10% EtOAc/Hexane as eluent, affording ester **14** (2.6 g, 99%) as a colorless liquid; R<sub>f</sub> = 0,73 (100% AcOEt).

**<sup>1</sup>H-NMR (CDCl<sub>3</sub>, δ):** 7.34 (1H, s, CH); 7.20 (1H, s, CH); 6.24 (1H, s, CH); 5.65 (1H, s, CH); 4.13 (2H, q, *J* = 6.9 Hz, CH<sub>2</sub>-OEt); 2.44 (2H, td, *J* = 20.0 Hz, *J* = 7.6 Hz, CH<sub>2</sub>); 2.14 (5H, m, CH<sub>3</sub> and CH<sub>2</sub>); 1.72 (2H, q, *J* = 7.5 Hz, CH<sub>2</sub>); 1.26 (3H, t, *J* = 7.2 Hz, CH<sub>3</sub>-OEt)

**<sup>13</sup>C-NMR (CDCl<sub>3</sub>, δ):** 166.8 (C=O); 159.5 (C); 142.8 (CH); 138.9 (CH); 124.4 (C); 115.8 (CH); 110.8 (CH); 59.5 (CH<sub>2</sub>-OEt); 40.3 (CH<sub>2</sub>); 27.6 (CH<sub>2</sub>); 24.2 (CH<sub>2</sub>); 18.7 (CH<sub>3</sub>); 14.3 (CH<sub>3</sub>-OEt)

**IR (film):** ν = 1709 cm<sup>-1</sup>

**MS (FAB<sup>+</sup>) [m/z, (%):** 223.16 ([M+1]<sup>+</sup>,44); 222.14 ([M]<sup>+</sup>,25); 221.15 (39); 219.18 (22); 217.16 (22); 215.13 (24); 209.14 (30); 207.15 (34); 203.17 (25); 202.16 (26); 193.16 (100); 192.15 (34); 191.17 (50); 177.21 (63); 163.24 (67); 155.23 (43); 154.21 (66); 151.36 (51); 151.16 (59).

**HRMS (FAB<sup>+</sup>):** Calcd. For C<sub>13</sub>H<sub>19</sub>O<sub>3</sub> 223.1334, found 223.1340.

## Compound 15

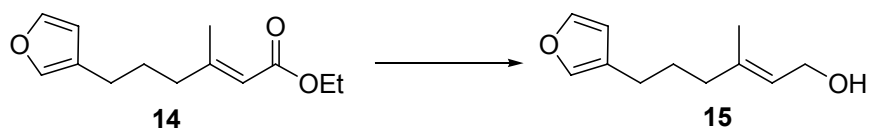

To a solution of ester **14** (684 mg, 3.1 mmol) in dichloromethane (20 mL) at -78°C was added Dibal (7.7 mL of a 1.0 M solution in hexane, 7.7 mmol) and the mixture was stirred at this temperature for 30 mn. TBME (4 mL) and H<sub>2</sub>O (0.5 mL) were added and the cooling bath was removed and stirring continued until formation of a white gel. H<sub>2</sub>O (0.5 mL) and an aqueous 4.0 M solution of NaOH (0.5 mL) were added and the stirring continued until formation of a white precipitate. Na<sub>2</sub>SO<sub>4</sub> was added and the salts were filtered under reduced pressure affording virtually pure allylic alcohol **15** (589 mg, 99%) as a colorless liquid; R<sub>f</sub> = 0,65 (50% EtOAc/Hexane).

**<sup>1</sup>H-NMR (CDCl<sub>3</sub>, δ):** 7.33 (1H, s, CH); 7.20 (1H, s, CH); 6.25 (1H, s, CH); 5.41 (1H, qt, *J* = 1.2 Hz, *J* = 6.9 Hz, CH); 4.15 (2H, d, *J* = 6.9 Hz, CH<sub>2</sub>); 2.39 (2H, t, *J* = 7.6 Hz, CH<sub>2</sub>); 2.05 (2H, t, *J* = 7.7 Hz, CH<sub>2</sub>); 1.69 (2H, t, *J* = 7.5 Hz, CH<sub>2</sub>); 1.66 (3H, s, CH<sub>3</sub>).

**<sup>13</sup>C-NMR (CDCl<sub>3</sub>, δ):** 142.8 (CH); 139.5 (C); 138.8 (CH); 124.9 (C); 123.6 (CH); 110.9 (CH); 59.4 (CH<sub>2</sub>); 39.0 (CH<sub>2</sub>); 27.9 (CH<sub>2</sub>); 24.3 (CH<sub>2</sub>); 16.2 (CH<sub>3</sub>).

**IR (film):** ν = 3333 (br) cm<sup>-1</sup>

**MS (EI<sup>+</sup>) [m/z, (%):** 180.11 ([M]<sup>+</sup>, 4); 95.03 (30); 94.02 ([M-C<sub>5</sub>H<sub>10</sub>O]<sup>+</sup>, 91); 82.00 ([M-C<sub>6</sub>H<sub>12</sub>O]<sup>+</sup>, 100); 71.00 (24).

**HRMS (EI<sup>+</sup>):** Calcd. For C<sub>11</sub>H<sub>16</sub>O<sub>2</sub> 180.1150, found 180.1145.

#### Compound 4

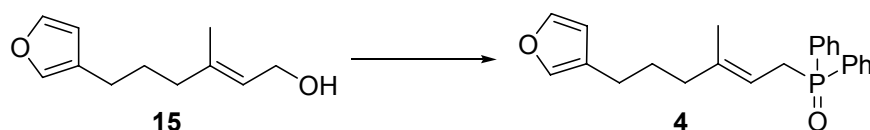

To a cooled (-20°C) solution of allylic alcohol **15** (390 mg, 1.75 mmol) in Et<sub>2</sub>O (2.5 mL) was added dropwise PBr<sub>3</sub> (85 μL, 0.87 mmol). The mixture was stirred for 2 h, quenched with H<sub>2</sub>O (10 mL) and extracted with Et<sub>2</sub>O (3 x 10 mL). The combined organic phases were washed with aqueous saturated solutions of NaHCO<sub>3</sub> (2 X10 mL) and NaCl (10 mL). Drying and solvent evaporation afforded the corresponding allylic bromide (429 mg, 89%) as an unstable colorless oil; R<sub>f</sub> = 0,75 (50% EtOAc/Hexane). This allylic bromide will be used in the next step without further purification.

A solution of PPh<sub>2</sub>H (250 μL; 1,44 mmol) in THF (6 mL) was cooled to 0°C and *n*-BuLi (576 mL of a 2.5 M solution in hexane, 1.44 mmol) was added. The bright red solution was stirred for 30 mn and cooled to -78°C before adding a solution of the previously obtained allylic bromide (191 mg; 0,79 mmol) in THF (4 mL). The mixture was stirred at this temperature for 1 h, allowed to reach 0°C before adding a solution of 5% H<sub>2</sub>O<sub>2</sub> (8 mL). Stirring was continued for 30 mn and the product extracted with CH<sub>2</sub>Cl<sub>2</sub> (3 x 20 mL). The combined organic phases were dried, filtered and evaporated to give a residue which was chromatographed on silica gel using 50% EtOAc/Hexane as eluent, affording phosphine oxide **4** (268 mg, 93%) as a white solid; m.p. = 67-69 °C, R<sub>f</sub> = 0,12 (50% EtOAc/Hexane).

**<sup>1</sup>H-NMR (CDCl<sub>3</sub>, δ):** 7.69 (4H, m, CH<sub>o</sub>-Ph); 7.48 (6H, m, CH<sub>p,m</sub>-Ph); 7.31 (1H, s, CH-5 furyl); 7.15 (1H, s, CH-2 furyl); 7.10 (1H, s, CH-2 furyl); 6.21 (1H, s, CH-4 furyl); 6.18 (1H, s, CH-4 furyl); 5.25 (1H, c, *J* = 6.5 Hz, CH-2); 3.09 (2H, dd, *J* = 14.7 Hz, *J* = 7.6 Hz, CH<sub>2</sub>-1); 3.02 (2H, dd, *J* = 14.69 Hz, *J* = 7.63 Hz, CH<sub>2</sub>-1); 2.29 (2H, t, *J* = 7.63 Hz, CH<sub>2</sub>-6); 2.22 (2H, t, *J* = 7.6 Hz, CH<sub>2</sub>-6); 1.97 (2H, m, CH<sub>2</sub>-4); 1.87 (2H, t, *J* = 7.9 Hz, CH<sub>2</sub>-4); 1.65 (2H, d, *J* = 3.4 Hz, CH<sub>2</sub>-5); 1.52 (2H, q, *J* = 7.6 Hz, CH<sub>2</sub>-5); 1.44 (3H, s, CH<sub>3</sub>-3)

**$^{13}\text{C-NMR}$  ( $\text{CDCl}_3$ ,  $\delta$ ):** 142.6 (CH-5 furyl); 140.8 (C-3); 138.8 (CH-2 furyl); 134.0 (C-Ph); 122.4 (C-Ph); 131.7 ( $\text{CH}_p$ -Ph); 131.7 ( $\text{CH}_p$ -Ph); 131.1 ( $\text{CH}_o$ -Ph); 131.0 ( $\text{CH}_o$ -Ph); 128.5 ( $\text{CH}_m$ -Ph); 128.4 ( $\text{CH}_m$ -Ph); 124.8 (C-3 furyl); 112.7 (CH-2 furyl); 110.9 (CH-4 furyl); 39.1 ( $\text{CH}_2$ -4); 31.1 y 30.4 ( $\text{CH}_2$ -1); 27.8 ( $\text{CH}_2$ -5); 23.9 ( $\text{CH}_2$ -6); 16.2 ( $\text{CH}_3$ -3).

**IR (film):**  $\nu = 1190$  (br)  $\text{cm}^{-1}$

**MS (FAB<sup>+</sup>) [ $m/z$ , (%):** 366.10 ( $[\text{M}+2]^+$ , 26); 365.10 ( $[\text{M}+1]^+$ , 100); 202.08 (34); 201.08 (45).

**HRMS (FAB<sup>+</sup>):** Calcd. For  $\text{C}_{23}\text{H}_{26}\text{O}_2\text{P}$  365.1670, found 365.1672.

## Compound 16

**16** is a known compound (J.M. Clough; H. Dube; B. J. Martin; G. Pattenden; K. S. Reddy; I. R. Waldron, *Organic & Biomolecular Chemistry* 2006, 4, 2906)

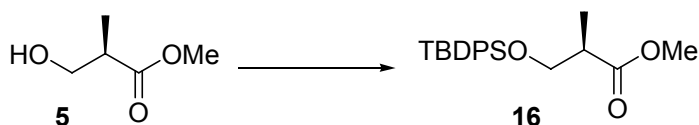

To a solution of alcohol **5** (0,96 g; 8,12 mmol) in DMF (30 mL), were added imidazole (1,1 g; 16,24 mmol), DMAP (catalytic) and TBDPSCI (2,3 mL; 8,94 mmol). The mixture was stirred at room temperature for 12 h, quenched with water and the product extracted with TBME (3 x 50 mL). The combined organic phases were washed with brine (2 x 75 mL), dried and rotatory evaporated to give a residue which was chromatographed on silica gel using 3% EtOAc/Hexane as eluent, affording **16** (3.2 g, 99%) as a colorless liquid, Rf: 0,30 (10% EtOAc/Hexane);  $[\alpha]_D^{20} = -18.3$  (C=1.6,  $\text{CHCl}_3$ )

**$^1\text{H-NMR}$  ( $\text{CDCl}_3$ ,  $\delta$ ):** 7.65 (4H, dd,  $J = 7.7$  Hz,  $J = 1.7$  Hz,  $\text{CH}_o$ -Ph); 7.38 (6H, m,  $\text{CH}_{p,m}$ -Ph); 3.82 (1H, dd,  $J = 9.7$  Hz,  $J = 6.9$  Hz, CH-3); 3.72 (1H, dd,  $J = 9.8$  Hz,  $J = 5.9$  Hz, CH-3); 3.68 (3H, s,  $-\text{OCH}_3$ ); 2.71 (1H, sex.,  $J = 6.8$  Hz, CH-2); 1,15 (3H, d,  $J = 7.1$  Hz,  $\text{CH}_3$ -2); 1.02 (9H, s,  $\text{CH}_3$ -*tert*-BuSi).

**$^{13}\text{C-NMR}$  ( $\text{CDCl}_3$ ,  $\delta$ ):** 175.4 (C=O); 135.6 ( $\text{CH}_o$ -Ph); 133.5 (C-Ph); 129.6 ( $\text{CH}_p$ -Ph); 127.6 ( $\text{CH}_m$ -Ph); 65.9 ( $\text{CH}_2$ -3); 51.5 ( $\text{CH}_3\text{O}$ ); 42.4 (CH-2); 26.7 ( $\text{CH}_3$ -*tert*-BuSi); 19.2 (C-Si); 13.5 ( $\text{CH}_3$ -2).

**IR (film):**  $\nu = 1741$   $\text{cm}^{-1}$

**MS (FAB<sup>+</sup>) [ $m/z$ , (%):** 357.16 ( $[\text{M}+1]^+$ , 5); 300.08 (25); 299.31 ( $[\text{M}-\text{tert-Bu}]^+$ , 100); 279.11 (48); 213.10 (26).

**HRMS (FAB<sup>+</sup>):** Calcd. For  $\text{C}_{21}\text{H}_{29}\text{O}_3\text{Si}$  357.1886, found 357.1897.

## Compound 17

**17** is a known compound (J.M. Clough; H. Dube; B. J. Martin; G. Pattenden; K. S. Reddy; I. R. Waldron, *Organic & Biomolecular Chemistry* 2006, 4, 2906)

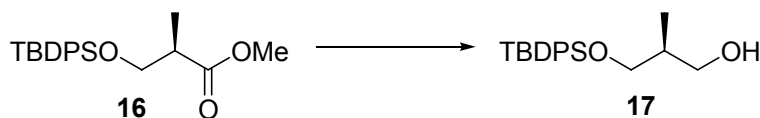

To a solution of ester **16** (1,6 g; 4,55 mmol) in  $\text{CH}_2\text{Cl}_2$  (30 mL) at  $-78^\circ\text{C}$ , was added Dibal (9.1 mL of a 1.0 M solution in hexane, 9.1 mmol) and the mixture stirred for 2 h. TBME (8,5 mL) and  $\text{H}_2\text{O}$  (1,3 mL) were added and the mixture allowed to reach room temperature, stirring vigorously until formation of a white gel.  $\text{H}_2\text{O}$  (1,3 mL) and a 4,0 M solution of  $\text{NaOH}$  (1,3 mL) were added and stirring continued until formation of a white precipitate.  $\text{Na}_2\text{SO}_4$  was added and the solids removed by filtration. After solvent evaporation the residue was chromatographed on silica gel using 10% EtOAc/Hexane as eluent, affording alcohol **17** (1.6 g, 99%) as a colorless liquid,  $R_f = 0,15$  (10% EtOAc/Hexane);  $[\alpha]_D^{20} = -8.0$  ( $C=0.6$ ,  $\text{CHCl}_3$ )

**$^1\text{H-NMR}$  ( $\text{CDCl}_3$ ,  $\delta$ ):** 7.67 (4H, dd,  $J= 7.8$  Hz,  $J= 1.6$  Hz,  $\text{CH}_o\text{-Ph}$ ); 7.41 (6H, m,  $\text{CH}_{p,m}\text{-Ph}$ ); 3.72 (1H, dd,  $J= 10.0$  Hz,  $J= 4.4$  Hz,  $\text{CH-3}$ ); 3.67 (2H, s.a.,  $\text{CH}_2\text{-1}$ ); 3.59 (1H, dd,  $J= 10.0$  Hz,  $J= 7.6$  Hz,  $\text{CH-3}$ ); 2.49 (1H, s.a.,  $\text{-OH}$ ); 1.99 (1H, sex.,  $J= 6.4$  Hz,  $\text{CH-2}$ ); 1.05 (9H, s,  $\text{CH}_3\text{-tert-Bu}$ ); 0.82 (3H, d,  $J= 6,9$  Hz,  $\text{CH}_3\text{-2}$ ).

**$^{13}\text{C-NMR}$  ( $\text{CDCl}_3$ ,  $\delta$ ):** 135.6 ( $\text{CH}_o\text{-Ph}$ ); 133.2 ( $\text{C-Ph}$ ); 129.8 ( $\text{CH}_m\text{-Ph}$ ); 127.8 ( $\text{CH}_p\text{-Ph}$ ); 68.7 ( $\text{CH}_2\text{-3}$ ); 67.7 ( $\text{CH}_2\text{-1}$ ); 37.3 ( $\text{CH-2}$ ); 26.8 ( $\text{CH}_3\text{-tert-Bu}$ ); 19.1 ( $\text{C-Si}$ ); 13.1 ( $\text{CH}_3\text{-2}$ ).

**IR (film):**  $\nu = 3364$  (br)  $\text{cm}^{-1}$

**MS (FAB $^+$ ) [ $m/z$ , (%)]:** 329.11 ( $[\text{M}+1]^+$ , 43); 311.11 ( $[\text{M-OH}]^+$ , 21); 271.05 ( $[\text{M-tert-Bu}]^+$ , 38); 199.10 (100); 197.12 (30); 193.12 (26).

**HRMS (FAB $^+$ ):** Calcd. For  $\text{C}_{20}\text{H}_{29}\text{O}_2\text{Si}$  329.1937, found 329.1935.

## Compound 18

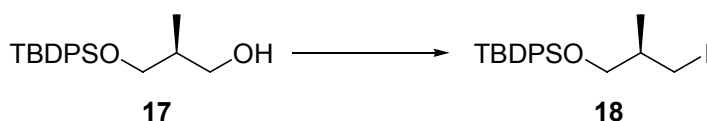

To a solution of alcohol **17** (2,5 g; 7,69 mmol) in THF (33 mL) were added  $\text{PPh}_3$  (2,4 g; 9,28 mmol) and imidazole (1,6 g; 23,07 mmol) and the mixture was stirred at room temperature till complete dissolution of the reagents. It was then cooled to  $-20^\circ\text{C}$  and  $\text{I}_2$  (2,2 g; 8,46 mmol) was added. After stirring at this temperature for 15 mn, the cooling bath was removed and the mixture stirred at room temperature for 30 mn. The reaction was quenched at  $0^\circ\text{C}$  with an aqueous saturated solution of  $\text{NaHCO}_3$  (50 mL), and the resulting white precipitate was removed by filtration. The aqueous phase was extracted

with *tert*-butylmethylether (TBME) (3 x 50 mL) and the combined organic phases were washed with 10% aqueous solution of Na<sub>2</sub>SO<sub>3</sub> (100 mL) and H<sub>2</sub>O (100 mL), dried over Na<sub>2</sub>SO<sub>3</sub>, filtered and the solvent evaporated to give a residue which was chromatographed on silica gel using 10% EtOAc/Hexane as eluent, affording iodide **18** (3 g, 90%) as a yellow liquid; R<sub>f</sub> = 0.85 (50% EtOAc /Hexane).

**<sup>1</sup>H-NMR (CDCl<sub>3</sub>, δ):** 7.68 (4H, m, CH<sub>o</sub>-Ph); 7.43 (6H, m, CH<sub>p,m</sub>-Ph); 3.60 (1H, dd, *J*= 10.1 Hz, *J*= 4.9 Hz, CH-1); 3.48 (1H, dd, *J*= 10.0 Hz, *J*= 6.9 Hz, CH-1); 3.41 (1H, dd, *J*= 9.5 Hz, *J*= 5.1 Hz, CH-3); 3.34 (1H, dd, *J*= 9.5 Hz, *J*= 5.8 Hz, CH-3); 1.74 (1H, sex., *J*= 5.9 Hz, CH-2); 1.08 (9H, s, CH<sub>3</sub>-*tert*-BuSi); 0.98 (3H, d, *J*= 6.7 Hz, CH<sub>3</sub>-2).

**<sup>13</sup>C-NMR (CDCl<sub>3</sub>, δ):** 135.6 (CH<sub>o</sub>-Ph); 133.6 (C-Ph); 129.7 (CH<sub>m</sub>-Ph); 127.7 (CH<sub>p</sub>-Ph); 67.3 (CH<sub>2</sub>-1); 37.5 (CH-2); 26.8 (CH<sub>3</sub>-*tert*-BuSi); 19.3 (C-Si); 17,31 (CH<sub>2</sub>-3); 13.5 (CH<sub>3</sub>-2).

**MS (FAB<sup>+</sup>) [m/z, (%)]:** 439.05 ([M+1]<sup>+</sup>, 3); 380.97 ([M-*tert*-Bu]<sup>+</sup>, 41); 308.91 (100); 246.92 (34); 199.09 (26); 197.11 (38).

**HRMS (FAB<sup>+</sup>):** Calcd. For C<sub>20</sub>H<sub>28</sub>OSi 439.0954, found 439.0967.

### Compound 19

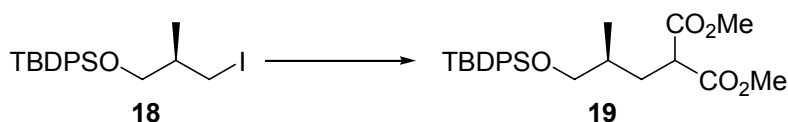

To a solution of NaH (0,55 g; 13,6 mmol) in DMF (1,5 mL) and THF (10 mL) was added dimethyl malonate (1,6 mL; 13,6 mmol) and the resulting white foam was stirred for 15 mn. Iodide **18** (3 g; 6,9 mmol) in THF (20 mL) was added and the mixture stirred for 18 h and allowed to reach room temperature. EtOAc (100 mL) was added and the mixture washed with brine (2 x 100 mL) and H<sub>2</sub>O (2 x 100 mL), dried and rotatory evaporated to give a residue which was chromatographed on silica gel using 6% EtOAc/Hexane as eluent, affording diester **19** (2.8 g, 91%) as a colorless oil, R<sub>f</sub> = 0,50 (30% EtOAc/Hexane).

**<sup>1</sup>H-NMR (CDCl<sub>3</sub>, δ):** 7.64 (4H, dd, *J*= 7.8 Hz, *J*= 1.5 Hz, CH<sub>o</sub>-Ph); 7.39 (6H, m, CH<sub>p,m</sub>-Ph); 3.71 (6H, s, -OCH<sub>3</sub>); 3.52 (1H, t, *J*= 7.7 Hz, CH-2); 3.49 (2H, d, *J*= 5.7 Hz, CH<sub>2</sub>-5); 2.11 (1H, m, CH-3); 1.76 (1H, m, CH-3); 1.67 (1H, m, CH-4); 1.05 (9H, s, CH<sub>3</sub>-*tert*-BuSi); 0,92 (3H, d, *J*= 6.5 Hz, CH<sub>3</sub>-4).

**<sup>13</sup>C-NMR (CDCl<sub>3</sub>, δ):** 170.1 (C=O); 170.0 (C=O); 135.6 (CH<sub>o</sub>-Ph); 133.7 (C-Ph); 129.6 (CH<sub>m</sub>-Ph); 127.6 (CH<sub>p</sub>-Ph); 68.4 (CH<sub>2</sub>-5); 52.4 (CH<sub>3</sub>O); 49.7 (CH-2); 33.7 (CH-4); 32.6 (CH<sub>2</sub>-3); 26.8 (CH<sub>3</sub>-*tert*-BuSi); 19.3 (C-Si); 16.6 (CH<sub>3</sub>-4).

**IR (film):** ν= 1737 cm<sup>-1</sup>

**MS (FAB<sup>+</sup>) [m/z, (%)]:** 443.33 ([M+1]<sup>+</sup>, 8); 386.23 (29); 385.22 ([M-*tert*-Bu]<sup>+</sup>, 100); 365.24 (36); 213.17 (40).

**HRMS (FAB<sup>+</sup>):** Calcd. For C<sub>25</sub>H<sub>35</sub>O<sub>5</sub>Si 443.2254, found 443.2254.

## Compounds 20 and 21

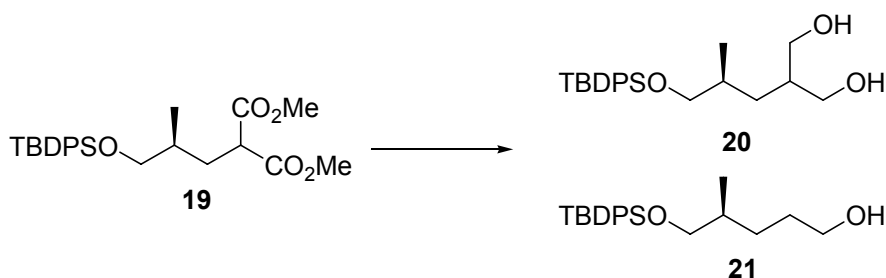

To a solution of diester **19** (2,6 g; 5,77 mmol) in DMSO (120 mL), was added NaCl (1,2 g; 20,2 mmol) and H<sub>2</sub>O (415,5 mL) and the mixture heated at 160°C while stirring, for 4 h. It was then allowed to reach room temperature. EtOAc (100 mL) was added and the mixture washed with brine (2 x 100 mL) and H<sub>2</sub>O (2 x 100 mL). The organic phase was dried, filtered and rotatory evaporated. The residue was dissolved in Et<sub>2</sub>O (44 mL) in a round bottom flask fitted with a reflux condenser and ice-cooled. LiAlH<sub>4</sub> (0,64 g; 16,95 mmol) was added portionwise. At the end of the addition, the cooling bath was removed and the mixture stirred at room temperature for 30 mn then recooled. H<sub>2</sub>O was added dropwise until complete destruction of excess LiAlH<sub>4</sub> and the mixture stirred for 30 mn before adding Na<sub>2</sub>SO<sub>4</sub>. The solids were removed by filtration and the filtrate concentrated to afford a residue which was chromatographed on silica gel using 10% EtOAc/Hexane as eluent, affording diol **20** (300 mg, 16%) as a colorless liquid, R<sub>f</sub> = 0,15 (50% EtOAc/Hexane) and alcohol **21** (1,47 g, 73%) as colorless liquid, R<sub>f</sub> = 0,60 (50% EtOAc/Hexane)

### Diol **20**.

**<sup>1</sup>H-NMR (CDCl<sub>3</sub>, δ):** 7.64 (4H, d, *J* = 6.8 Hz, CH<sub>o</sub>-Ph); 7.39 (6H, m, CH<sub>p,m</sub>-Ph); 3.75 (2H, dt, *J* = 10.8 Hz, *J* = 3.5 Hz, CH<sub>2</sub>-1); 3.59 (2H, m, CH<sub>2</sub>-1); 3.47 (2H, d, *J* = 5.7 Hz, CH<sub>2</sub>-5); 1.92 (1H, s, -OH); 1.81 (1H, s, -OH); 1.69 (1H, sex., *J* = 6.6 Hz, CH-4); 1.35 (1H, q, *J* = 6.8 Hz, CH-2); 1.05 (9H, s, CH<sub>3</sub>-*tert*-BuSi); 0.98 (2H, dd, *J* = 13.9 Hz, *J* = 6.8 Hz, CH<sub>2</sub>-3); 0.92 (3H, d, *J* = 6.8 Hz, CH<sub>3</sub>-4).

**<sup>13</sup>C-NMR (CDCl<sub>3</sub>, δ):** 135.6 (CH<sub>o</sub>-Ph); 133.9 (C-Ph); 129.6 (CH<sub>m</sub>-Ph); 127.6 (CH<sub>p</sub>-Ph); 68.9 (CH<sub>2</sub>-5); 67.3 (CH<sub>2</sub>-1); 66.5 (CH<sub>2</sub>-1); 39.4 (CH-2); 33.3 (CH-4); 31.2 (CH<sub>2</sub>-3); 26.7 (CH<sub>3</sub>-*tert*-BuSi); 19.3 (C-Si); 17.2 (CH<sub>3</sub>-4).

**IR (film):** ν = 3353 (br) cm<sup>-1</sup>

**MS (FAB<sup>+</sup>) [m/z, (%)]:** 387.23 ([M+1]<sup>+</sup>, 14); 199.11 (100); 197.13 (52).

**HRMS (FAB<sup>+</sup>):** Calcd. For C<sub>23</sub>H<sub>35</sub>O<sub>3</sub>Si 387.2355, found 387.2351.

### Alcohol **21**.

**<sup>1</sup>H-NMR (CDCl<sub>3</sub>, δ):** 7.66 (4H, dd, *J* = 7.9 Hz, *J* = 1.6 Hz, CH<sub>o</sub>-Ph); 7.39 (6H, m, CH<sub>p,m</sub>-Ph); 3.59 (2H, t, *J* = 6.7 Hz, CH<sub>2</sub>-1); 3.51 (1H, dd, *J* = 9.9 Hz, *J* = 5.9 Hz, CH-5); 3.46 (1H, dd, *J* = 9.86 Hz, *J* = 6.20 Hz, CH-5); 1.66 (1H, sex., *J* = 6.4 Hz, CH-4); 1.61-

1.39 (4H, m, -OH, CH<sub>2</sub>-2, CH-3); 1.16 (1H, m, CH-3); 1.05 (9H, s, CH<sub>3</sub>-*tert*-BuSi); 0.92 (3H, d, *J* = 6.7 Hz, CH<sub>3</sub>-4).

<sup>13</sup>C-NMR (CDCl<sub>3</sub>, δ): 135.6 (CH<sub>o</sub>-Ph); 134.0 (C-Ph); 129.5 (CH<sub>m</sub>-Ph); 127.6 (CH<sub>p</sub>-Ph); 68.8 (CH<sub>2</sub>-5); 63.3 (CH<sub>2</sub>-1); 35.5 (CH-4); 30.2 (CH<sub>2</sub>-2); 29.2 (CH<sub>2</sub>-3); 26.9 (CH<sub>3</sub>-*tert*-BuSi); 19.3 (C-Si); 16.8 (CH<sub>3</sub>-4).

IR (film): ν = 3363 (br) cm<sup>-1</sup>

MS (FAB<sup>+</sup>) [*m/z*, (%)]: 357.15 ([M+1]<sup>+</sup>, 14); 299.07 ([M-*tert*-Bu]<sup>+</sup>, 14); 199.09 (100); 197.11 (42).

HRMS (FAB<sup>+</sup>): Calcd. For C<sub>22</sub>H<sub>33</sub>O<sub>2</sub>Si 357.2250, found 357.2264.

## Compound 22

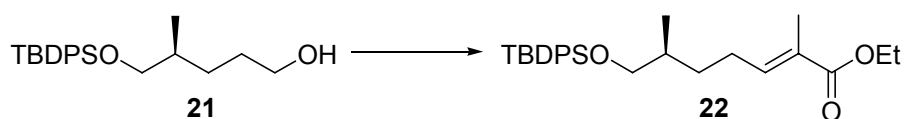

To a solution of alcohol **21** (566 mg; 1,6 mmol) in CH<sub>2</sub>Cl<sub>2</sub> (12 mL) were added 4Å molecular sieves (362 mg), 4-methylmorpholine N-oxide (NMO, 373 mg, 3,2 mmol) and a catalytic amount of TPAP. The mixture was stirred at room temperature for 3 h, filtered through celite and the solvent rotatory evaporated to give a residue which was dissolved in THF (100 mL). Ph<sub>3</sub>PCCH<sub>3</sub>CO<sub>2</sub>Et (575 mg; 1,6 mmol) was added and the mixture refluxed for 18 h, allowed to reach room temperature and the solvent removed. The residue which was chromatographed on silica gel using 5% EtOAc/Hexane as eluent, affording diol **22** (696 mg, 60%) as a colorless oil, R<sub>f</sub> = 0,45 (10% EtOAc/Hexane).

<sup>1</sup>H-NMR (CDCl<sub>3</sub>, δ): 7.65 (4H, d, *J* = 7.6 Hz, CH<sub>o</sub>-Ph); 7.39 (6H, m, CH<sub>p,m</sub>-Ph); 6.73 (1H, t, *J* = 7.2 Hz, CH-3); 4.18 (2H, c, *J* = 7.0 Hz, CH<sub>2</sub>-OEt); 3.48 (2H, dd, *J* = 5.4 Hz, *J* = 3.9 Hz, CH<sub>2</sub>-7); 2.14 (1H, q, *J* = 7.4 Hz, CH-6); 1.64 (3H, s, CH<sub>3</sub>-2); 1.27 (5H, m, CH<sub>3</sub>-OEt, CH<sub>2</sub>-5); 1.04 (9H, s, CH<sub>3</sub>-*tert*-BuSi); 0.93 (3H, d, *J* = 6.5 Hz, CH<sub>3</sub>-6).

<sup>13</sup>C-NMR (CDCl<sub>3</sub>, δ): 168.3 (C=O); 142.4 (CH-3); 135.6 (CH<sub>o</sub>-Ph); 134.0 (C-Ph); 129.6 (CH<sub>p</sub>-Ph); 127.7 (C-2); 127.6 (CH<sub>m</sub>-Ph); 68.5 (CH<sub>2</sub>-7); 60.3 (CH<sub>2</sub>-OEt); 35.4 (CH-6); 32.0 (CH<sub>2</sub>-5); 26.9 (CH<sub>3</sub>-*tert*-BuSi); 26.2 (CH<sub>2</sub>-4), 19.3 (C-Si); 16.7 (CH<sub>3</sub>-6); 14.3 (CH<sub>3</sub>-OEt); 12.3 (CH<sub>3</sub>-2).

IR (film): ν = 1709 cm<sup>-1</sup>

MS (FAB<sup>+</sup>) [*m/z*, (%)]: 381.16 ([M-*tert*-Bu]<sup>+</sup>, 94); 199.08 ([M-C<sub>15</sub>H<sub>27</sub>O<sub>2</sub>]<sup>+</sup>, 100).

HRMS (FAB<sup>+</sup>): Calcd. For C<sub>23</sub>H<sub>29</sub>O<sub>3</sub>Si 381.1886, found 381.1894.



## Compound 23

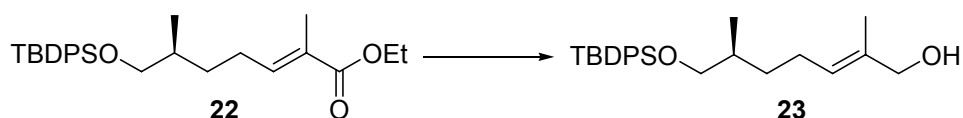

To a solution of ester **22** (0,83 g; 1,89 mmol) in CH<sub>2</sub>Cl<sub>2</sub> (12 mL) at -78°C was added Dibal (5.7 mL of a 1.0 M solution in hexane, 5.7 mmol) and the mixture was stirred at this temperature for 30 mn. TBME (2.6 mL) and H<sub>2</sub>O (0.4 mL) were added and the cooling bath was removed and stirring continued until formation of a white gel. H<sub>2</sub>O (0.4 mL) and an aqueous 4.0 M solution of NaOH (0.4 mL) were added and the stirring continued until formation of a white precipitate. Na<sub>2</sub>SO<sub>4</sub> was added and the salts were filtered under reduced pressure to give a residue which was chromatographed on silica gel using 8% EtOAc/Hexane as eluent, affording allylic alcohol **23** (0,72 g, 96%) as a colorless liquid, R<sub>f</sub> = 0,60 (30% EtOAc/Hexane); [α]<sub>D</sub><sup>20</sup> = -1.0 (C=3.4, CHCl<sub>3</sub>).

**<sup>1</sup>H-NMR (CDCl<sub>3</sub>, δ):** 7.66 (4H, dd, *J* = 7.8 Hz, *J* = 1.5 Hz, CH<sub>o</sub>-Ph); 7.39 (6H, m, CH<sub>p,m</sub>-Ph); 5.37 (1H, t, *J* = 7.0 Hz, CH-3); 3.98 (2H, s, CH<sub>2</sub>-1); 3.52 (1H, dd, *J* = 9.8 Hz, *J* = 5.6 Hz, CH-7); 3.46 (1H, dd, *J* = 9.9 Hz, *J* = 6.1 Hz, CH-7); 2.02 (2H, sept., *J* = 7.9 Hz, CH<sub>2</sub>-4); 1.67 (1H, m, CH-5); 1.64 (3H, s, CH<sub>3</sub>-2); 1.51 (1H, m, CH-5); 1.37 (1H, s.a., -OH); 1,18 (1H, m, CH-5); 1.05 (9H, s, CH<sub>3</sub>-*tert*-BuSi); 0.94 (3H, d, *J* = 6.7 Hz, CH<sub>3</sub>-6).

**<sup>13</sup>C-NMR (CDCl<sub>3</sub>, δ):** 135.6 (CH<sub>o</sub>-Ph); 134.6 (C-2); 134.1 (C-Ph); 129.5 (CH<sub>p</sub>-Ph); 127.6 (CH<sub>m</sub>-Ph); 126.6 (CH-3); 69.5 (CH<sub>2</sub>-7); 68.7 (CH<sub>2</sub>-1); 35.4 (CH-6); 32.9 (CH<sub>2</sub>-5); 26.9 (CH<sub>3</sub>-*tert*-BuSi); 25.3 (CH<sub>2</sub>-4), 19.3 (C-Si); 16.8 (CH<sub>3</sub>-6); 13.3 (CH<sub>3</sub>-2).

**IR (film):** ν = 3333 (br) cm<sup>-1</sup>

**MS (FAB<sup>+</sup>) [m/z, (%)]:** 321.12 ([M-*tert*-Bu-OH]<sup>+</sup>, 4); 199.08 ([M-C<sub>13</sub>H<sub>26</sub>O]<sup>+</sup>, 100).

**HRMS (FAB<sup>+</sup>):** Calcd. For C<sub>21</sub>H<sub>25</sub>OSi 321.1675, found 321.1664.

## Compound 6

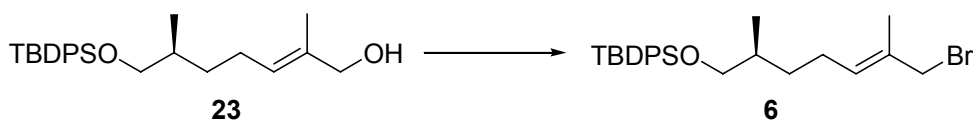

To a solution of allylic alcohol **23** (0,52 g; 1,31 mmol) in CH<sub>2</sub>Cl<sub>2</sub> (12,5 mL) at 0°C, were added CBr<sub>4</sub> (0,52 g; 1,57 mmol) and PPh<sub>3</sub> (450 mg; 2,09 mmol) and the mixture stirred for 1 h. Hexane (40 mL) was added and the resulting white precipitate was removed by filtration through celite. The filtrate was concentrated till formation of the same white precipitate which was again removed by filtration through celite. The solvent was removed affording virtually pure allylic bromide **6** (0,6 g, 99%) as a colorless liquid, R<sub>f</sub> = 0,70 (30% EtOAc/Hexane).

**<sup>1</sup>H-NMR (CDCl<sub>3</sub>, δ):** 7.66 (4H, dd, *J* = 7.8 Hz, *J* = 1.6 Hz, CH<sub>o</sub>-Ph); 7.40 (6H, m, CH<sub>p,m</sub>-Ph); 5.57 (1H, t, *J* = 7.1 Hz, CH-3); 3.96 (2H, s, CH<sub>2</sub>-1); 3.51 (1H, dd, *J* = 9.8 Hz, *J* = 5.8 Hz, CH-7); 3.46 (1H, dd, *J* = 9.8 Hz, *J* = 5.9 Hz, CH-7); 2.01 (2H, sex., *J* = 6.3 Hz, CH<sub>2</sub>-4); 1.73 (3H, s, CH<sub>3</sub>-2); 1.65 (1H, sex., *J* = 6.4 Hz, CH-5); 1.53 (1H, m, CH-5); 1.19 (1H, m, CH-6); 1.06 (9H, s, CH<sub>3</sub>-*tert*-BuSi); 0.93 (3H, d, *J* = 6.7 Hz, CH<sub>3</sub>-6).

**<sup>13</sup>C-NMR (CDCl<sub>3</sub>, δ):** 135.6 (CH<sub>o</sub>-Ph); 134.0 (C-Ph); 131.8 (CH-3); 129.5 (CH<sub>p</sub>-Ph); 127.6 (CH<sub>m</sub>-Ph); 68.6 (CH<sub>2</sub>-7); 41.9 (CH<sub>2</sub>-1); 35.3 (CH-6); 32.5 (CH<sub>2</sub>-4); 26.9 (CH<sub>3</sub>-*tert*-BuSi); 25.8 (CH<sub>2</sub>-5), 19.3 (C-Si); 16.8 (CH<sub>3</sub>-6); 14.6 (CH<sub>3</sub>-2).

**MS (FAB<sup>+</sup>) [m/z, (%)]:** 459.06 ([M+1]<sup>+</sup>, 8); 401.23 ([M-*tert*-BuSi]<sup>+</sup>, 50).

**HRMS (FAB<sup>+</sup>):** Calcd. For C<sub>25</sub>H<sub>36</sub>BrOSi 459.1719, found 459.1523.

## Compound 25

**25** is a known compound (S. Hanessian, A. Tehim, P. Chen, *J. Org. Chem.* 1993, **58**, 7768)

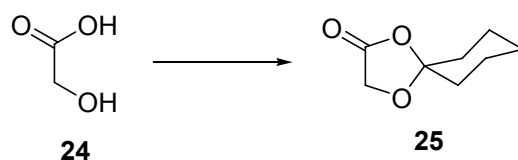

To a solution of acid **24** (15,4 g; 202,3 mmol) in Et<sub>2</sub>O (500 mL) at 0°C was added BF<sub>3</sub>·OEt<sub>2</sub> (38,5 mL; 303,5 mmol) and freshly distilled cyclohexanone (21 mL; 202,3 mmol). The mixture was stirred at this temperature for 1 h, the cooling bath was removed and stirring was continued at room temperature for 2 days. An aqueous solution of 10% AcNa (1000 mL) was added and the mixture stirred for 20 mn and extracted with TBME (3 x 750 mL). The combined organic phases were dried and rotatory evaporated to give a residue which was chromatographed on silica gel using 1% EtOAc/Hexane as eluent, affording **25** (23.1 g, 73%) as a white solid; m.p. = 38-40 °C, R<sub>f</sub> = 0.6 (50% EtOAc/Hexane).

**<sup>1</sup>H-RMN (CDCl<sub>3</sub>, δ):** 4,32 (2H, s, CH<sub>2</sub>-2); 1,82 (2H, m, CH<sub>ec</sub>-2', CH<sub>ec</sub>-6'); 1,78-1,61 (6H, m, CH<sub>ax</sub>-2', CH<sub>ax</sub>-6', CH<sub>2</sub>-3', CH<sub>2</sub>-5'); 1,45 (2H, m, CH<sub>2</sub>-4').

**<sup>13</sup>C-RMN (CDCl<sub>3</sub>, δ):** 171.5 (C=O); 113.5 (C-1'); 63.3 (CH<sub>2</sub>-2); 35.3 (CH<sub>2</sub>-6', CH<sub>2</sub>-2'); 24.4 (CH<sub>2</sub>-4'); 23.0 ((CH<sub>2</sub>-5', CH<sub>2</sub>-3').

**IR (film):** ν = 1710 cm<sup>-1</sup>

**MS (EI<sup>+</sup>) [m/z, (%)]:** 156.08 ([M]<sup>+</sup>, 23); 113.02 ([M-C<sub>2</sub>H<sub>3</sub>O]<sup>+</sup>, 56); 98.07 ([M-C<sub>2</sub>H<sub>2</sub>O<sub>2</sub>]<sup>+</sup>, 100); 70.04 (23).

**HRMS (EI<sup>+</sup>):** Calcd. For C<sub>8</sub>H<sub>12</sub>O<sub>3</sub> 156.0786, found 156.0789.

## Compound 26

**26** is a known compound (R. Ramage, G. J. Griffiths, F. E. Shut, J. N. Sweeney, *J. Chem. Soc. Perkin Trans 1*, 1984, 7, 1539)

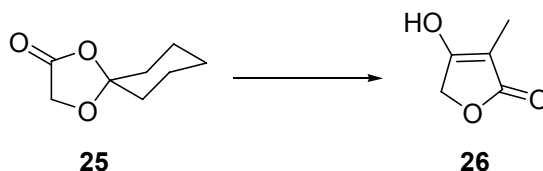

To a solution of diisopropylamine (9,2 mL; 65,6 mmol) in THF (66 mL) at  $-78^{\circ}\text{C}$  was added dropwise *n*-BuLi (25 mL of a 2.5 M solution in hexane, 62.5 mmol) and the mixture was stirred at this temperature for 25 mn. Methyl propionate (6 mL; 62,5 mmol) in THF (62,5 mL) was then added and stirring was continued for 25 mn. Compound **25** (3,9 mg; 25 mmol) in THF (62,5 mL) was added to the mixture at  $-78^{\circ}\text{C}$ . The cooling bath was removed and the mixture stirred at room temperature overnight. The organic solvent was removed under vacuum, Et<sub>2</sub>O (10 mL) and H<sub>2</sub>O (10 mL) were added and the mixture acidified to pH=1 with HCl. The aqueous phase was saturated with NaCl and extracted with 10% MeOH/CH<sub>2</sub>Cl<sub>2</sub> (15 x 100 mL). The combined organic phases were dried and rotatory evaporated to give a solid residue which was washed several times with Et<sub>2</sub>O affording **26** (1,46 g, 51%). as a white solid ; m.p. = 180-182 °C, R<sub>f</sub> = 0.05 (50% EtOAc /Hexane).

<sup>1</sup>H-NMR (DMSO, δ): 4.55 (2H, t, *J*= 1.2 Hz, CH<sub>2</sub>-5); 1.57 (3H, q, *J*= 1.2 Hz, CH<sub>3</sub>-3)

<sup>13</sup>C-NMR (DMSO, δ): 175.2 (C-4); 172.9 (C-2); 94.4 (C-3); 66.5 (CH<sub>2</sub>-5); 5.9 (CH<sub>3</sub>-3).

IR (film):  $\nu$ = 3345 (br), 1762, 1678 cm<sup>-1</sup>

MS (EI<sup>+</sup>) [*m/z*, (%)]: 114.03 ([M]<sup>+</sup>, 100).

HRMS (EI<sup>+</sup>): Calcd. For C<sub>5</sub>H<sub>6</sub>O<sub>3</sub> 114.0317, found 114.0305.

## Compound 28

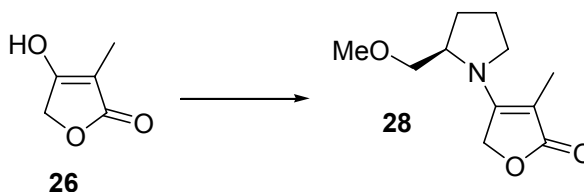

To a solution of **26** (332 mg; 2,9 mmol) in C<sub>6</sub>H<sub>6</sub> (8 mL) was added (*R*)-2-methoxymethylpyrrolidine (0,36 mL; 2,9 mmol) and a catalytic amount of *p*-TsOH. The reaction flask was fitted with a Dean-Stark and the mixture heated at 130°C for 24 h. The solvent was then removed under vacuum and the residue was chromatographed on silica gel using 20% EtOAc/Hexane as eluent, affording **28** (493 mg, 80%) as a yellow oil, R<sub>f</sub>: 0,25 (100% EtOAc).

**<sup>1</sup>H-NMR (CDCl<sub>3</sub>, δ):** 4.68 (1H, d, *J*=14.6 Hz, CH-5); 4.53 (1H, d, *J*= 14.5 Hz, CH-5); 3.98 (1H, m, CH-2'); 3.57 (1H, q, *J*= 5.3 Hz, CH<sub>2</sub>-5'); 3.43 (1H, q, *J*= 8.5 Hz, CH-5'); 3.33 (1H, m, CH-1''); 3.30 (3H, s, -OCH<sub>3</sub>); 3.25 (1H, dd, *J*= 6.7 Hz, *J*= 9.4 Hz, CH-1''); 1.95 (4H, m, CH<sub>2</sub>-3', CH<sub>2</sub>-4'); 1.92 (3H, s, CH<sub>3</sub>-3).

**<sup>13</sup>C-NMR (CDCl<sub>3</sub>, δ):** 177.2 (C=O); 160.3 (C-4); 88.9 (C-3); 77.5 (CH<sub>2</sub>-1''); 66.7 (CH<sub>2</sub>-5); 59.3 (CH-2'); 58.8 (-OCH<sub>3</sub>); 48.7 (CH<sub>2</sub>-5'); 28.1 (CH<sub>2</sub>-3'); 23.0 (CH<sub>2</sub>-4'); 9.0 (CH<sub>3</sub>-3).

**IR (film):** ν= 1731, 1621 cm<sup>-1</sup>

**MS (FAB<sup>+</sup>) [m/z, (%)]:** 213.22 ([M+1]<sup>+</sup>, 100); 212.22 ([M]<sup>+</sup>, 18); 166.27 (23).

**HRMS (FAB<sup>+</sup>):** Calcd. For C<sub>11</sub>H<sub>18</sub>NO<sub>3</sub> 212.1287, found 212.1287

### Compound 29

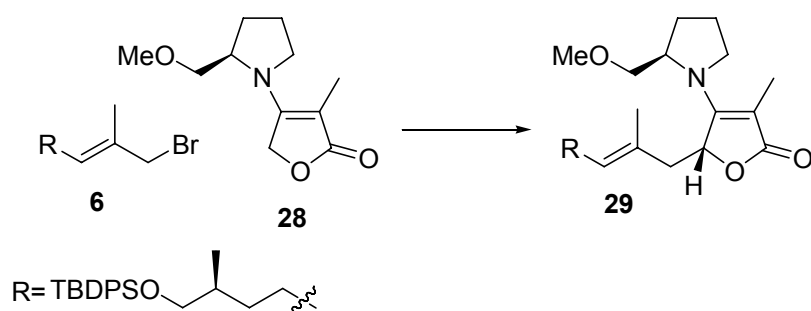

To a solution of diisopropylamine (110 μL; 0,78 mmol) in THF (2 mL) and HMPA (272 μL) at -78°C was added dropwise *n*-BuLi (314 μL of a 2.5 M solution in hexane, 0,78 mmol) and the mixture was stirred at this temperature for 25 mn. Compound **28** (61 mg; 0,32 mmol) in THF (2 mL) was added and the mixture stirred for 1 h, before adding bromide **6** (96 mg; 0,21 mmol) in THF (2 mL). Stirring was continued overnight at -78°C. The reaction was quenched with aqueous saturated solution of NH<sub>4</sub>Cl (10 mL) and the product extracted with CH<sub>2</sub>Cl<sub>2</sub> (3 x 10 mL). The combined organic phases were dried and rotatory evaporated to give a residue which was chromatographed on silica gel using 15% EtOAc/Hexane as eluent, affording **29** (90 mg, 75%) as a yellowish oil, R<sub>f</sub> = 0.40 (50% EtOAc /Hexane); [ $\alpha$ ]<sub>D</sub><sup>20</sup> = -13.1 (C=1.0, CHCl<sub>3</sub>)

**<sup>1</sup>H-NMR (CDCl<sub>3</sub>, δ):** 7.65 (4H, m, CH<sub>o</sub>-Ph); 7.37 (6H, m, CH<sub>p,m</sub>-Ph); 5.20 (1H, s, CH-3'''); 4.79 (1H, d, *J*= 4.7 Hz, CH-5); 4.73 (1H, d, *J*= 4.7 Hz, CH-5); 4.16 (1H, m, CH-2'); 3.62-3.14 (6H, m, CH<sub>2</sub>-7'', CH<sub>2</sub>-1'', CH<sub>2</sub>-5'); 3.32 (3H, s, -OCH<sub>3</sub>); 3.31 (3H, s, -OCH<sub>3</sub>); 2.65 (1H, d, *J*= 13.9 Hz, CH-1'''); 2.51 (1H, d, *J*= 13.9 Hz, CH-1'''); 2.17-1.82 (6H, m, CH<sub>2</sub>-4''', CH<sub>2</sub>-3', CH<sub>2</sub>-4'); 1.90 (3H, s, CH<sub>3</sub>-3); 1.88 (3H, s, CH<sub>3</sub>-3); 1.66 (3H, s, CH<sub>3</sub>-2'''); 1.65 (3H, s, CH<sub>3</sub>-2'''); 1.67-1.58 (1H, m, CH-6'''); 1.54-1.40 (1H, m, CH-5'''); 1.22- 1.08 (1H, m, CH-5'''); 1.04 (9H, s, CH<sub>3</sub>-*tert*-BuSi); 0.91 (3H, d, *J*= 6,8 Hz, CH<sub>3</sub>-6''').

**<sup>13</sup>C-NMR (CDCl<sub>3</sub>, δ):** 175.8 (C=O); 163.0 and 162.2 (C-4); 135.3 (CH<sub>o</sub>-Ph); 134.0 (C-Ph); 129.6 and 129.6 (C-2'''); 129.3 (CH<sub>p</sub>-Ph); 128.9 and 128.5 (CH-3'''); 127.3 (CH<sub>m</sub>-Ph); 90.5 and 89.1 (C-3); 76.8 and 77.8 (CH-5); 74.3 and 72.8 (CH<sub>2</sub>-1''); 68.5 (CH<sub>2</sub>-

7'''); 59.2 and 59.1 (-OCH<sub>3</sub>); 58.4 (CH-2''); 48.9 (CH<sub>2</sub>-5'); 44.0 and 42.2 (CH<sub>2</sub>-1'''); 35.2 (CH-6'''); 32.7 (CH<sub>2</sub>-5'''); 28.1 and 27.6 (CH<sub>2</sub>-3'); 26.6 (CH<sub>3</sub>-*tert*-BuSi); 25.3 and 25.2 (CH<sub>2</sub>-4'''); 23.3 (CH<sub>2</sub>-4'); 19.0 (C-Si); 16.5 and 16.4 (CH<sub>3</sub>-6'''); 9.2 and 9.1 (CH<sub>3</sub>-3).

**IR (film):**  $\nu = 1736, 1619 \text{ cm}^{-1}$

**MS (FAB<sup>+</sup>) [m/z, (%):** 590.28 ([M+1]<sup>+</sup>, 16); 533.21 (32); 532.21 (79); 513.25 (38); 512.24 (100).

**HRMS (FAB<sup>+</sup>):** Calcd. For C<sub>36</sub>H<sub>52</sub>NO<sub>4</sub>Si 590.3666, found 590.3676.

### Compound 30

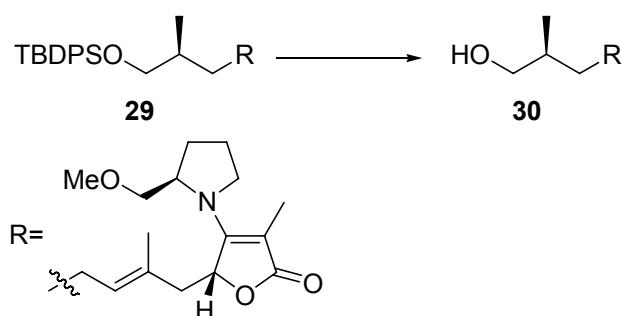

To a solution of **29** (85 mg; 0.15 mmol) in THF (2 mL) was added TBAF (150  $\mu$ L of 1.0 M in THF, 0.15 mmol) and the mixture stirred for 3 h. H<sub>2</sub>O (5 mL) was added and the product extracted with CH<sub>2</sub>Cl<sub>2</sub> (2 x 10 mL). The combined organic phases were dried and rotary evaporated to give a residue which was chromatographed on silica gel using 30% EtOAc/Hexane as eluent, affording alcohol **30** (51 mg, 89%) as a yellowish oil, R<sub>f</sub> = 0.12 (50% EtOAc /Hexane).

**<sup>1</sup>H-NMR (CDCl<sub>3</sub>,  $\delta$ ):** 5.20 (1H, s, CH-3'''); 4.83 (1H, d,  $J = 4.8$  Hz, CH-5); 4.76 (1H, d,  $J = 4.8$  Hz, CH-5); 4.25-4.05 (1H, m, CH-2''); 3.69-3.11 (6H, m, CH<sub>2</sub>-7'', CH<sub>2</sub>-1'', CH<sub>2</sub>-5'); 3.31 (3H, s, -OCH<sub>3</sub>); 2.65 (1H, d,  $J = 14.9$  Hz, CH-1'''); 2.55 (1H, d,  $J = 14.9$  Hz, CH-1'''); 2.22-1.77 (6H, m, CH<sub>2</sub>-4''', CH<sub>2</sub>-3', CH<sub>2</sub>-4'); 1.88 (3H, s, CH<sub>3</sub>-3); 1.85 (3H, s, CH<sub>3</sub>-3); 1.65 (3H, s, CH<sub>3</sub>-2'''); 1.63 (3H, s, CH<sub>3</sub>-2'''); 1.60-1.38 (1H, m, CH-6''', CH-5'''); 1.12 (1H, m, CH-5'''); 0.88 (3H, dd,  $J = 6.5$  Hz,  $J = 1.7$  Hz, CH<sub>3</sub>-6''').

**<sup>13</sup>C-NMR (CDCl<sub>3</sub>,  $\delta$ ):** 176.3 and 176.2 (C=O); 163.2 and 162.5 (C-4); 129.7 and 129.3 (C-2'''); 129.5 and 129.1 (CH-3'''); 89.4 and 89.1 (C-3); 76.5 (CH-5); 74.5 and 72.5 (CH<sub>2</sub>-1''); 68.1 (CH<sub>2</sub>-7'''); 59.4 and 59.3 (-OCH<sub>3</sub>); 58.6 and 58.3 (CH-2'); 49.3 and 49.2 (CH<sub>2</sub>-5'); 43.6 and 42.7 (CH<sub>2</sub>-1'''); 35.0 and 34.8 (CH-6'''); 32.7 (CH<sub>2</sub>-5'''); 28.3 and 27.8 (CH<sub>2</sub>-3'); 25.3 and 25.1 (CH<sub>2</sub>-4'''); 23.5 and 22.3 (CH<sub>2</sub>-4'); 16.7 and 16.4 (CH<sub>3</sub>-6'''); 9.4 and 9.2 (CH<sub>3</sub>-3).

**IR (film):**  $\nu = 3376$  (br), 1736, 1619  $\text{cm}^{-1}$

**MS (FAB<sup>+</sup>) [m/z, (%):** 352.23 ([M+1]<sup>+</sup>, 13).

**HRMS (FAB<sup>+</sup>):** Calcd. For C<sub>20</sub>H<sub>34</sub>NO<sub>4</sub> 352.2488, found 352.2377.

### Compound 31

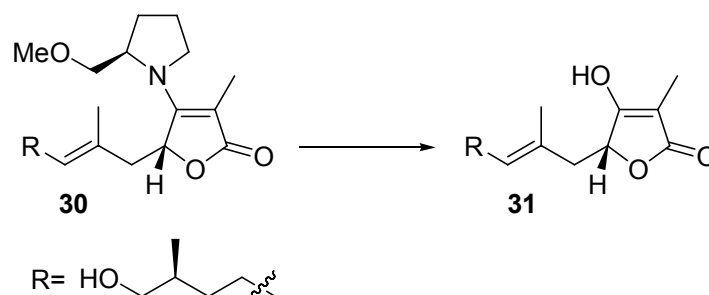

To a solution of alcohol **30** (103 mg; 0,29 mmol) in THF (10 mL) was added 10% HCl (3 mL) and the mixture heated at 50°C for 48 h, before adding H<sub>2</sub>O (15 mL) and extracting with CH<sub>2</sub>Cl<sub>2</sub> (3x 10 mL). The combined organic phases were dried and rotatory evaporated to give a residue which was chromatographed on silica gel using 40% EtOAc/Hexane as eluent, affording diol **31** (36 mg, 90%) as a colorless oil, R<sub>f</sub> = 0.10 (100% EtOAc).

**<sup>1</sup>H-NMR (CDCl<sub>3</sub>, δ):** 5.24 (1H, t, *J* = 7.3 Hz, CH-3'); 4.76 (1H, brs., CH-5); 3.42 (2H, dd, *J* = 6.4 Hz, *J* = 3.3 Hz, CH-7'); 2.62 (1H, dd, *J* = 14.5 Hz, *J* = 3.2 Hz, CH-1'); 2.27 (1H, dd, *J* = 14.3 Hz, *J* = 7.1 Hz, CH-1'); 2.08-1.88 (2H, m, CH<sub>2</sub>-4'); 1.67 (3H, s, CH<sub>3</sub>-3); 1.58 (1H, m, CH-6'); 1.55 (3H, s, CH<sub>3</sub>-2'); 1.44 (1H, m, CH-5'); 1.14 (1H, m, CH-5'); 0.87 (3H, d, *J* = 6.7 Hz, CH<sub>3</sub>-6').

**<sup>13</sup>C-NMR (CDCl<sub>3</sub>, δ):** 177.2 (C-4); 175.9 (C=O); 129.3 (C-2'); 129.2 (CH-3'); 97.0 (C-3); 78.1 (CH-5); 68.7 (CH<sub>2</sub>-7'); 41.8 (CH<sub>2</sub>-1'); 34.9 (CH-6'); 33.0 (CH<sub>2</sub>-5'); 25.4 (CH<sub>2</sub>-4'); 17.1 (CH<sub>3</sub>-2'); 16.7 (CH<sub>3</sub>-6'); 6.3 (CH<sub>3</sub>-3).

**IR (film):** ν = 3331 (br), 1756, 1672 cm<sup>-1</sup>

**MS (FAB<sup>+</sup>) [m/z, (%)]:** 256.23 ([M+1]<sup>+</sup>, 67); 255.10 ([M]<sup>+</sup>, 22); 155.25 (33); 154.25 (100).

**HRMS (FAB<sup>+</sup>):** Calcd. For C<sub>14</sub>H<sub>22</sub>O<sub>4</sub> 254.1518, found 254.1608.

### Compound 32

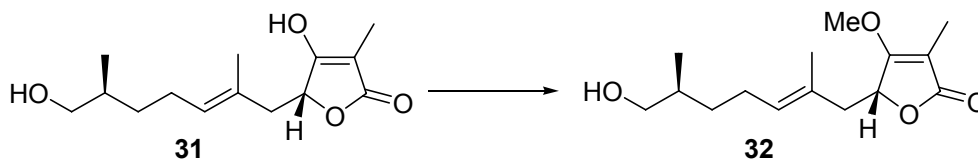

To a solution of diol **31** (38 mg; 0,15 mmol) in THF (1 mL) at 0°C was first added MeOH (6,1 μL; 0,15 mmol) then PPh<sub>3</sub> (39 mg; 0,15 mmol) and DIAD (30 μL; 0,15 mmol). The resulting mixture was stirred at 0°C for 16 h. The solvent was then removed under vacuum and the residue was chromatographed on silica gel using 20%

EtOAc/Hexane as eluent, affording **32** (36 mg, 90%) as a yellow liquid,  $R_f = 0,40$  (100% EtOAc);  $[\alpha]_D^{20} = 29.3$  (C=0.85, CHCl<sub>3</sub>)

**<sup>1</sup>H-NMR (CDCl<sub>3</sub>, δ):** 5.23 (1H, q,  $J = 6.6$  Hz, CH-3'); 4.65 (1H, d,  $J = 7.8$  Hz, CH-5); 4.07 (3H, s, -OCH<sub>3</sub>); 3.42 (2H, m, CH-7'); 2.55 (1H, d,  $J = 14.5$  Hz, CH-1'); 2.15 (1H, dd,  $J = 14.4$  Hz,  $J = 7.4$  Hz, CH-1'); 2.07-1.90 (2H, m, CH<sub>2</sub>-4'); 1.94 (3H, s, CH<sub>3</sub>-3); 1.63 (3H, s, CH<sub>3</sub>-2'); 1.61 (1H, m, CH-6'); 1.44 (1H, m, CH-5'); 1.14 (1H, m, CH-5'); 0.90 (3H, m, CH<sub>3</sub>-6').

**<sup>13</sup>C-NMR (CDCl<sub>3</sub>, δ):** 175.1 (C-4); 173.3 (C=O); 129.5 (CH-3'); 129.1 (C-2'); 97.6 (C-3); 76.9 (CH-5); 68.2 (CH<sub>2</sub>-7'); 58.6 (CH<sub>3</sub>-O); 41.7 (CH<sub>2</sub>-1'); 35.1 (CH-6'); 32.9 (CH<sub>2</sub>-5'); 25.3 (CH<sub>2</sub>-4'); 16.8 (CH<sub>3</sub>-2'); 16.4 (CH<sub>3</sub>-6'); 8.3 (CH<sub>3</sub>-3).

**IR (film):**  $\nu = 3357$  (br), 1757, 1672 cm<sup>-1</sup>

**MS (FAB<sup>+</sup>):** 269.17 ([M+1]<sup>+</sup>, 100); 268.15 ([M]<sup>+</sup>, 22); 207.13 (25); 185.20 (32); 155.25 (23); 154.25 (63).

**HRMS (FAB<sup>+</sup>):** Calcd. For C<sub>15</sub>H<sub>25</sub>O<sub>4</sub> 269.1753, found 269.1757.

### Compound 7

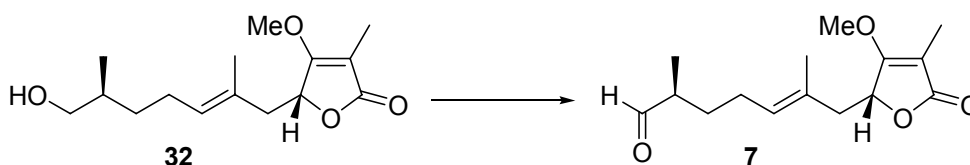

To a solution of oxalyl chloride (0,61 mL of a 2. M solution in CH<sub>2</sub>Cl<sub>2</sub>, 1,22 mmol) in CH<sub>2</sub>Cl<sub>2</sub> (0,5 mL) at -78°C was added dropwise a solution of DMSO (0,61 mL; 2,44 mmol) in CH<sub>2</sub>Cl<sub>2</sub> (0,9 mL) and the mixture stirred for 20 mn before adding alcohol **32** (163 mg; 0,61 mmol) in CH<sub>2</sub>Cl<sub>2</sub> (0,87 mL). After stirring for 20 mn, Et<sub>3</sub>N (0,61 mL) was added, the cooling bath was removed and the mixture stirred at room temperature for 30 mn. H<sub>2</sub>O (20 mL) was added and the product extracted with EtOAc (3 x 20 mL). The combined organic phases were dried and rotatory evaporated to afford virtually pure aldehyde **7** (161 mg, 99%) as a colorless liquid,  $R_f = 0,65$  (100% EtOAc).

**<sup>1</sup>H-NMR (CDCl<sub>3</sub>, δ):** 9.60 (1H, s, CHO); 5.23 (1H, q,  $J = 7.1$  Hz, CH-3'); 4.65 (1H, d,  $J = 7.9$  Hz, CH-5); 4.08 (3H, s, -OCH<sub>3</sub>); 2.55 (1H, d,  $J = 15.5$  Hz, CH-6'); 2.33 (1H, m, CH-1'); 2.15 (1H, dd,  $J = 14.9$  Hz,  $J = 7.9$  Hz, CH-1'); 2.05 (2H, q,  $J = 7.3$  Hz, CH<sub>2</sub>-4'); 1.96 (3H, s, CH<sub>3</sub>-3); 1.75 (1H, m, CH-5'); 1.64 (3H, s, CH<sub>3</sub>-2'); 1.58 (1H, m, CH-6'); 1.39 (1H, m, CH-5'); 1.08 (3H, d,  $J = 7,1$  Hz, CH<sub>3</sub>-6').

**<sup>13</sup>C-NMR (CDCl<sub>3</sub>, δ):** 205.0 (C=O); 174.8 (C-4); 173.1 (C=O); 130.6 (C-2'); 127.8 (CH-3'); 97.7 (C-3); 76.8 (CH-5); 58.7 (-OCH<sub>3</sub>); 45.7 (CH-6'); 41.7 (CH<sub>2</sub>-1'); 30.2 (CH-5'); 32.9 (CH<sub>2</sub>-5'); 25.3 (CH<sub>2</sub>-4'); 16.7 (CH<sub>3</sub>-2'); 13.0 (CH<sub>3</sub>-6'); 8.4 (CH<sub>3</sub>-3).

**IR (film):**  $\nu = 1757, 1738, 1672$  cm<sup>-1</sup>

**MS (FAB<sup>+</sup>) [m/z, (%):** 267.17 ([M+1]<sup>+</sup>, 27); 266.15 ([M]<sup>+</sup>, 7); 251.17 (32); 155.25 (43); 154.25 (100).

**HRMS (FAB<sup>+</sup>):** Calcd. For C<sub>15</sub>H<sub>22</sub>O<sub>4</sub> 266.1518, found 266.1458.

### Compound 33

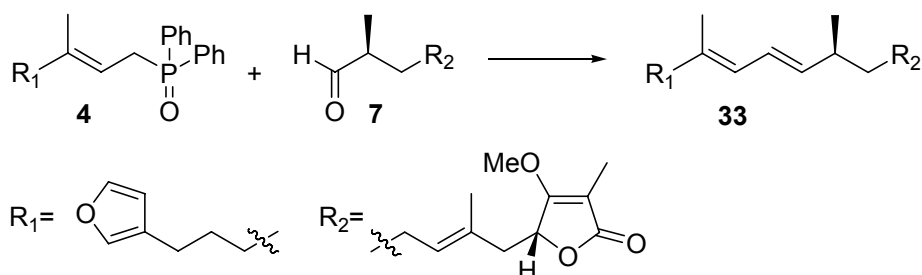

To phosphine oxide **4** (4 mL of a 0,086 M solution in THF, 0.35 mmol) at  $-78^{\circ}\text{C}$  was added *n*-BuLi (111  $\mu\text{L}$  of a 2.5 M solution in hexane, 0.28 mmol) and the resulting deep red solution was stirred for 1 h before adding aldehyde **7** (37 mg; 0,14 mmol) in THF (3 mL). After stirring for 30 mn the mixture was allowed to reach room temperature overnight. The mixture was quenched with an aqueous saturated solution of  $\text{NH}_4\text{Cl}$  (5 mL) and extracted with con EtOAc (3 x 10 mL). The organic phases were washed with brine (20 mL), dried and rotatory evaporated to give a residue which was chromatographed on silica gel using 5% EtOAc/Hexane as eluent, affording compound **33** [57 mg, 40%, E;E / E;Z (8/1)] as a colorless oil,  $R_f = 0.30$  (30% EtOAc/Hexane).

**$^1\text{H-NMR}$  ( $\text{CDCl}_3$ ,  $\delta$ ):** 7.33 (1H, s, CH-5 furyl); 7.19 (1H, s, CH-2 furyl); 6.25 (1H, s, CH-4 furyl); 6.18 (1H, dd,  $J = 15.0$  Hz,  $J = 10.9$  Hz, CH-8'); 5.78 (1H, d,  $J = 11.1$  Hz, CH-9'); 5.42 (1H, dq,  $J = 7.8$  Hz,  $J = 2.8$  Hz, CH-7'); 5.22 (1H, t,  $J = 6.7$  Hz, CH-3'); 4.64 (1H, d,  $J = 6.7$  Hz, CH-5); 4.07 (3H, s,  $\text{CH}_3$ -4); 2.53 (1H, d,  $J = 14.4$  Hz, CH-1'); 2.39 (2H, t,  $J = 7.5$  Hz, CH-13'); 2.15 (2H, m, CH-1', CH-6'); 2.06 (2H, t,  $J = 7.5$  Hz, C-11'); 1.96 (3H, s,  $\text{CH}_3$ -3); 1.66 (8H, m,  $\text{CH}_3$ -10',  $\text{CH}_3$ -2',  $\text{CH}_2$ -4'); 1.28 (4H, m,  $\text{CH}_2$ -12',  $\text{CH}_2$ -5'); 0.99 (3H, d,  $J = 6.4$  Hz,  $\text{CH}_3$ -6').

**$^{13}\text{C-NMR}$  ( $\text{CDCl}_3$ ,  $\delta$ ):** 174.9 (C-4); 173.3 (C=O); 142.6 (CH-5 furyl); 138.9 (CH-2 furyl); 138.1 (CH-7'); 136.1 (C-10'); 129.3 (C-2'); 129.2 (CH-3'); 126.0 (CH-9'); 125.1 (CH-8'); 125.0 (C-3 furyl); 111.0 (CH-4 furyl); 97.5 (C-3); 77.1 (CH-5); 58.6 ( $\text{CH}_3$ -O); 41.9 ( $\text{CH}_2$ -1'); 39.3 ( $\text{CH}_2$ -11'); 36.9 ( $\text{CH}_2$ -5'); 36.6 (CH-6'); 28.1 ( $\text{CH}_2$ -12'); 25.9 ( $\text{CH}_2$ -4'); 24.4 ( $\text{CH}_2$ -13'); 20.8 ( $\text{CH}_3$ -6'); 16.8 ( $\text{CH}_3$ -10'); 16.5 ( $\text{CH}_3$ -2'); 8.4 ( $\text{CH}_3$ -3).

**IR (film):**  $\nu = 1752, 1665 \text{ cm}^{-1}$

**MS (FAB<sup>+</sup>) [ $m/z$ , (%)]:** 414.29 (20); 413.29 ( $[\text{M}+1]^+$ , 67); 412.27 ( $[\text{M}]^+$ , 32); 411.27 (20); 285.23 (27); 209.20 (37); 203.23 (29); 195.21 (22); 189.23 (33); 183.24 (22); 178.23 (29); 175.27 (45); 173.28 (31); 169.25 (20); 167.26 (20); 165.26 (37); 163.29 (20); 161.30 (33); 159.30 (34); 155.28 (20); 154.27 (100); 151.44 (22).

**HRMS (FAB<sup>+</sup>):** Calcd. For  $\text{C}_{26}\text{H}_{37}\text{O}_4$  413.2692, found 413.2694.



## Compound 1

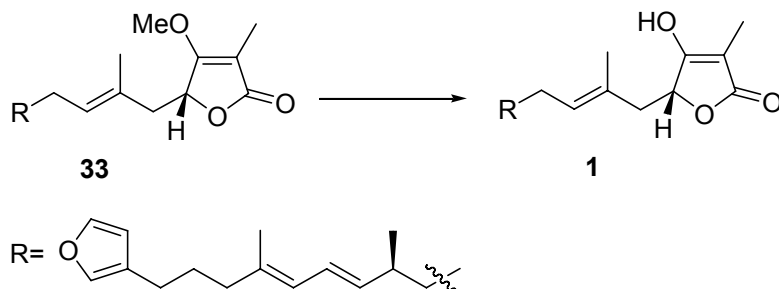

To a solution of triene **33** (23 mg; 56  $\mu\text{mol}$ ) in HMPA (200  $\mu\text{L}$ ) was added  $n\text{-C}_3\text{H}_7\text{SLi}$  (224  $\mu\text{L}$  of a 0.5 M solution in HMPA, 0.11 mmol) and the mixture was stirred at room temperature for 2 h; 10% HCl (2 mL) was added and the product extracted with  $\text{CH}_2\text{Cl}_2$  (3 x 5 mL). The combined organic phases were dried and rotatory evaporated to give a residue which was chromatographed on silica gel using 15% EtOAc/Hexane as eluent, affording palinurin **1** (20 mg, 90%) as a colorless oil,  $R_f = 0.25$  (100% EtOAc);  $[\alpha]_D^{20} = 28.8$  ( $C=0.12$ ,  $\text{CHCl}_3$ ).

**$^1\text{H-NMR}$  ( $\text{CDCl}_3$ ,  $\delta$ ):** 7.33 (1H, d,  $J = 1.4$  Hz, CH-5 furilo); 7.19 (1H, s, CH-2 furilo); 6.25 (1H, s, CH-4 furilo); 6.18 (1H, dd,  $J = 14.9$  Hz,  $J = 10.9$  Hz, CH-8'); 5.78 (1H, d,  $J = 10.4$  Hz, CH-9'); 5.42 (1H, dd,  $J = 15.2$  Hz,  $J = 7.9$ , CH-7'); 5.28 (1H, t,  $J = 6.8$  Hz, CH-3'); 4.74 (1H, c,  $J = 3.7$  Hz, CH-5); 2.59 (1H, dd,  $J = 14.3$  Hz,  $J = 3.7$  Hz, CH-1'); 2.38 (2H, t,  $J = 7.6$  Hz,  $\text{CH}_2$ -13'); 2.25 (1H, dd,  $J = 14.1$  Hz,  $J = 7.9$  Hz, CH-1'); 2.15 (1H, m, CH-6'); 2.05 (2H, t,  $J = 7.6$  Hz,  $\text{CH}_2$ -11'); 1.97 (2H, q,  $J = 7.2$  Hz,  $\text{CH}_2$ -4'); 1.72 (3H, s,  $\text{CH}_3$ -10'); 1.70 (3H, s,  $\text{CH}_3$ -2'); 1.66 (3H, s,  $\text{CH}_3$ -3); 1.30 (4H, m,  $\text{CH}_2$ -12',  $\text{CH}_2$ -5'); 0.99 (3H, d,  $J = 6.8$  Hz,  $\text{CH}_3$ -6').

**$^{13}\text{C-NMR}$  ( $\text{CDCl}_3$ ,  $\delta$ ):** 177.1 (C-4); 176.4 (C=O); 142.6 (CH-5 furyl); 138.9 (CH-2 furyl); 138.0 (CH-7'); 136.2 (C-10'); 129.8 (CH-2'); 129.3 (C-3'); 125.9 (CH-9'); 125.1 (CH-8'); 124.9 (CH-3 furyl); 111.0 (CH-4 furyl); 96.4 (C-3); 77.6 (CH-5); 41.9 ( $\text{CH}_2$ -1'); 39.3 ( $\text{CH}_2$ -11'); 36.9 ( $\text{CH}_2$ -5'); 36.7 (CH-6'); 28.2 ( $\text{CH}_2$ -12'); 26.0 ( $\text{CH}_2$ -4'); 24.4 ( $\text{CH}_2$ -13'); 20.8 ( $\text{CH}_3$ -6'); 16.6 ( $\text{CH}_3$ -10'); 16.5 ( $\text{CH}_3$ -2'); 5.9 ( $\text{CH}_3$ -3).

**IR (film):**  $\nu = 3423$  (br), 1755, 1673  $\text{cm}^{-1}$

**MS (FAB $^+$ ) [ $m/z$ , (%)]:** 399.20 ( $[\text{M}+1]^+$ , 63); 398.13 ( $[\text{M}]^+$ , 72); 356.08 (18); 355.07 (73); 341.02 (37); 326.97 (54); 283.07 (35); 282.05 (31); 281.14 (65); 267.01 (44); 251.05 (19).

**HRMS (FAB $^+$ ):** Calcd. For  $\text{C}_{25}\text{H}_{35}\text{O}_4$  399.2535, found 399.2534.

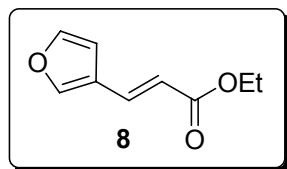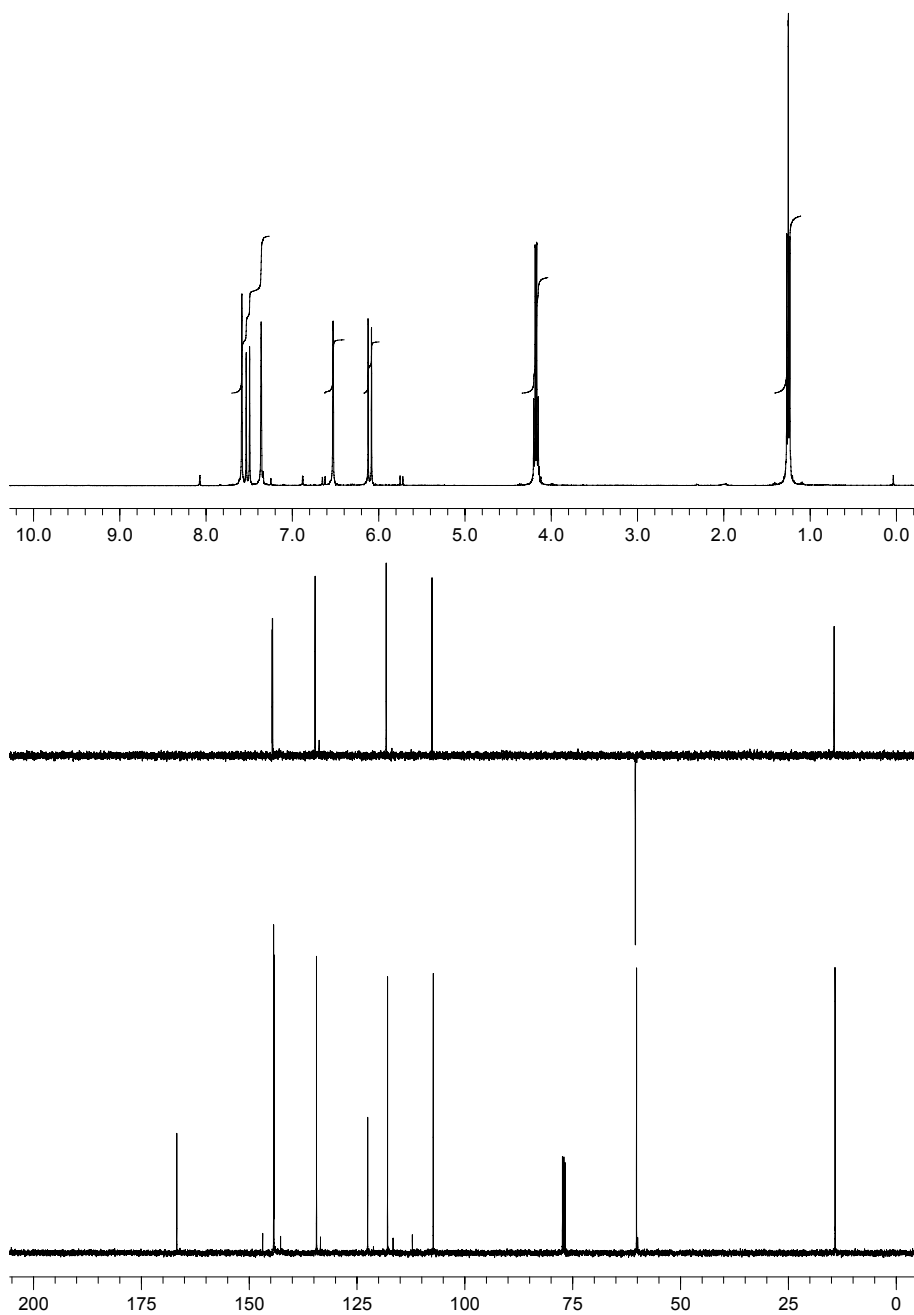

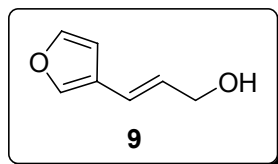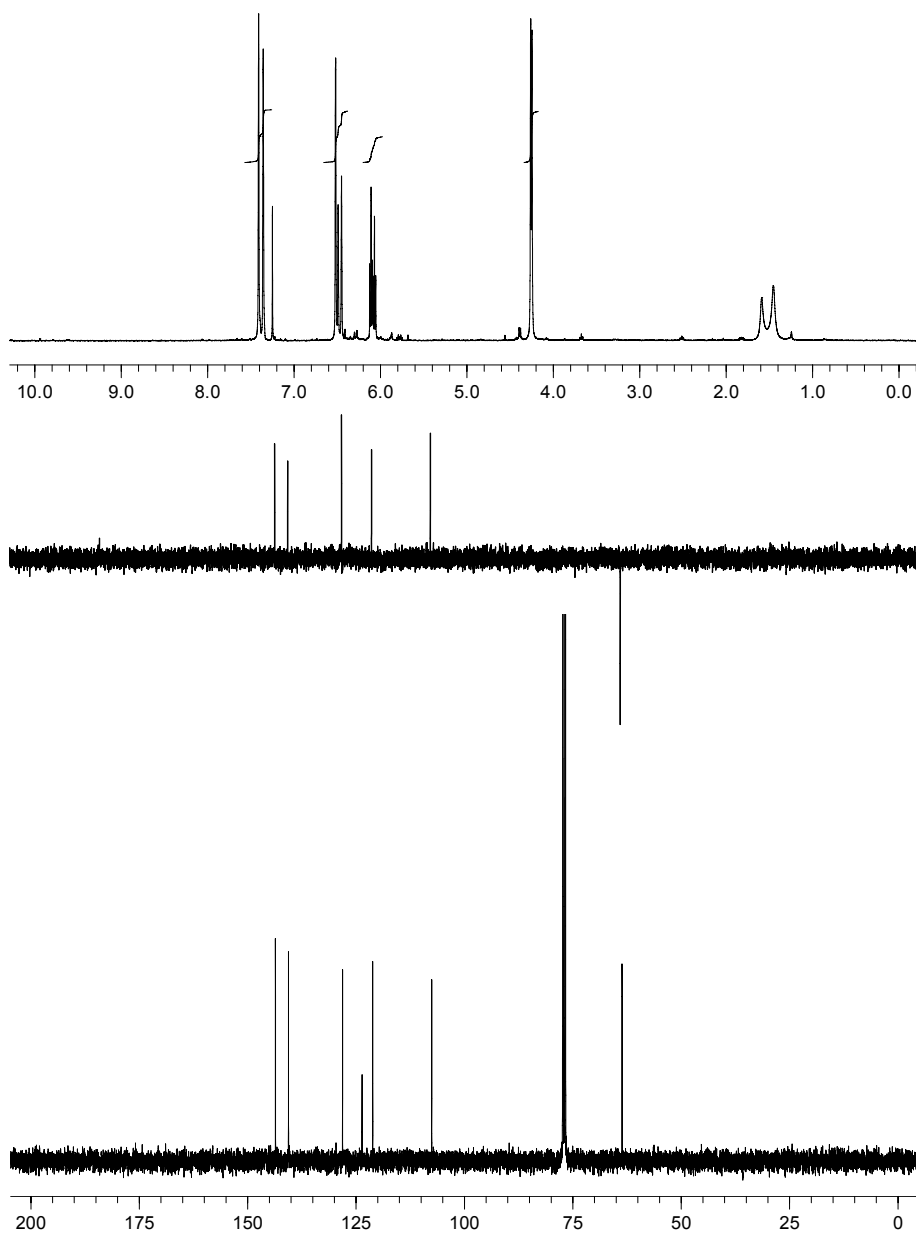

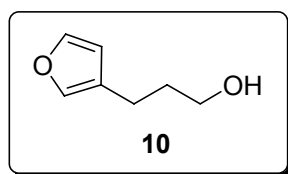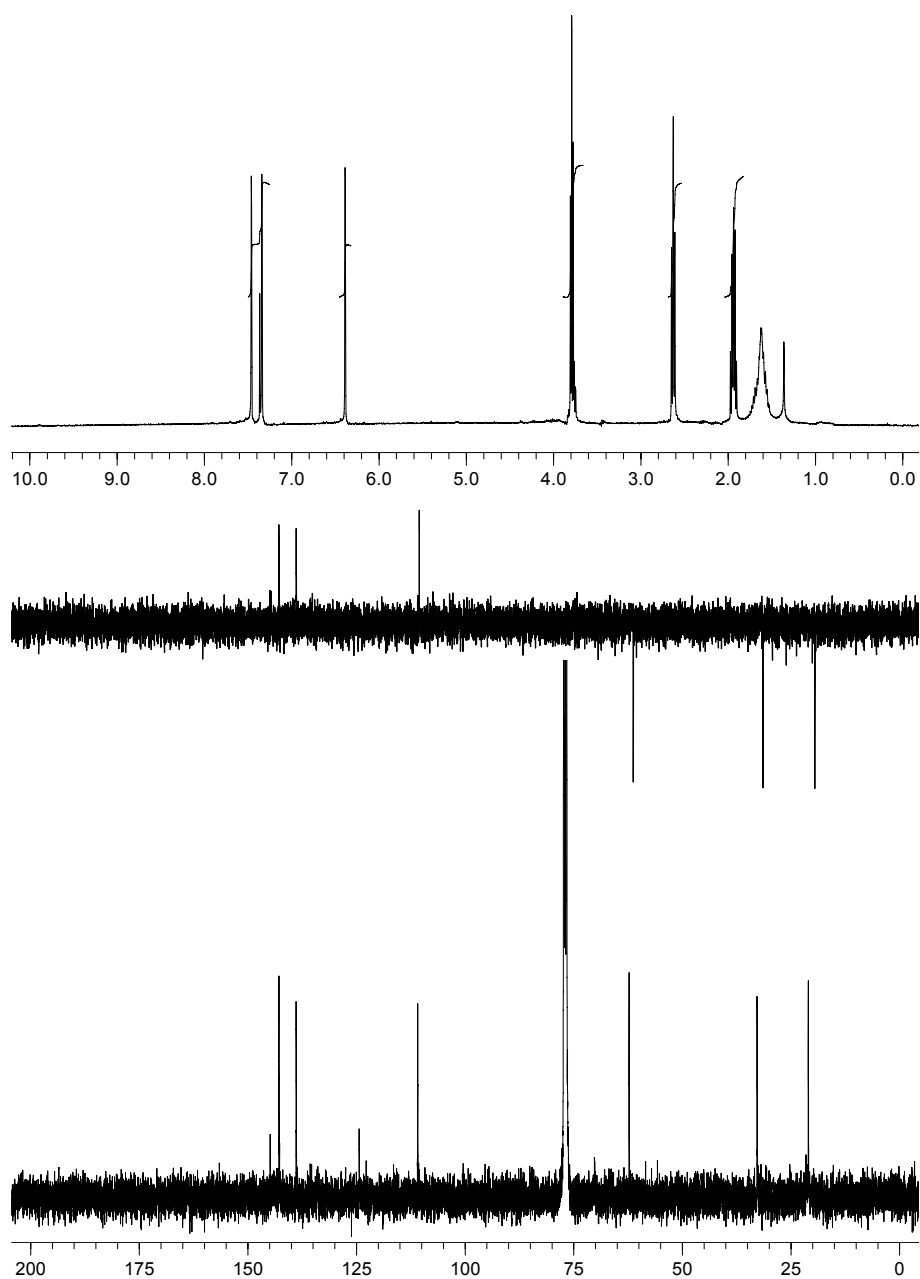

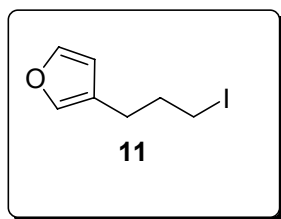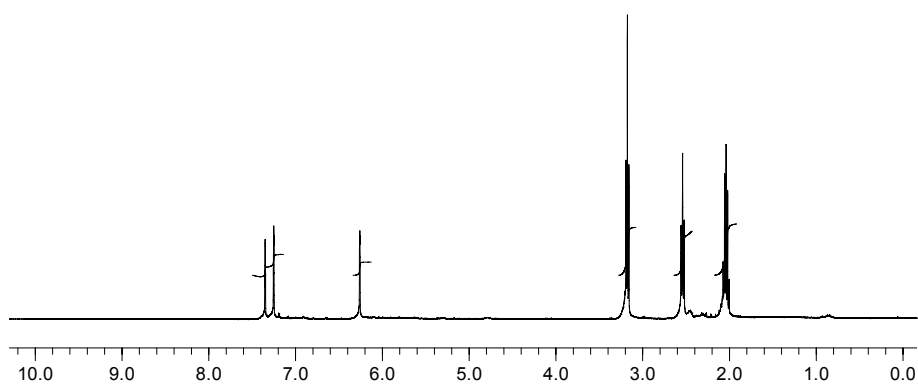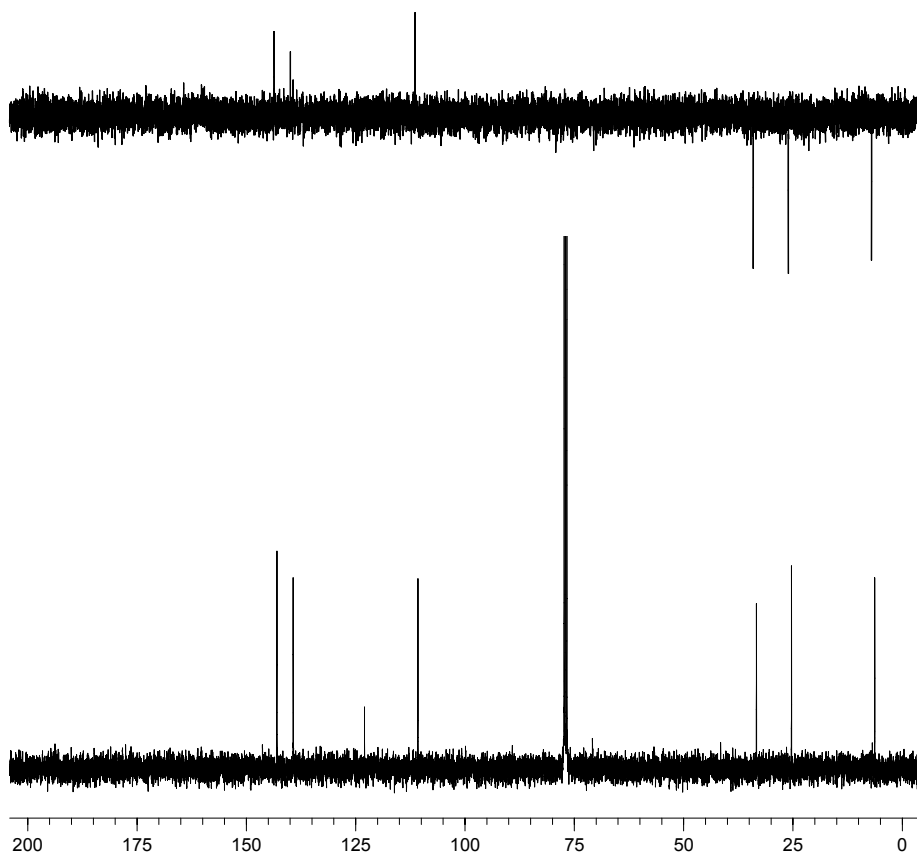

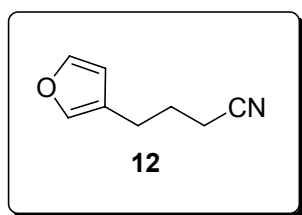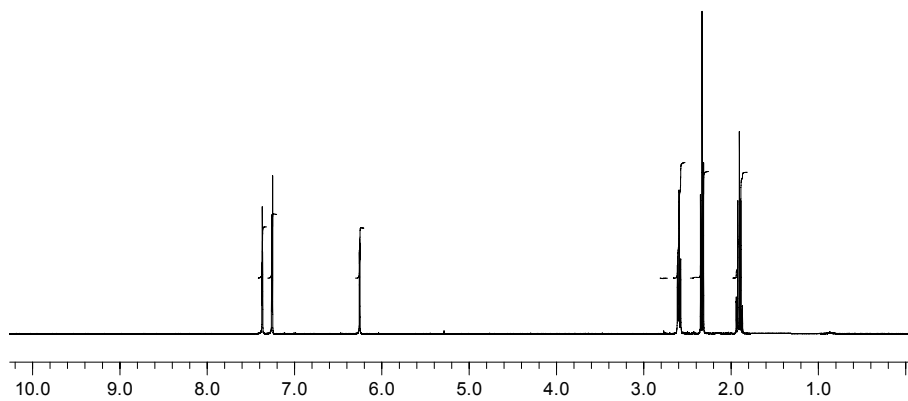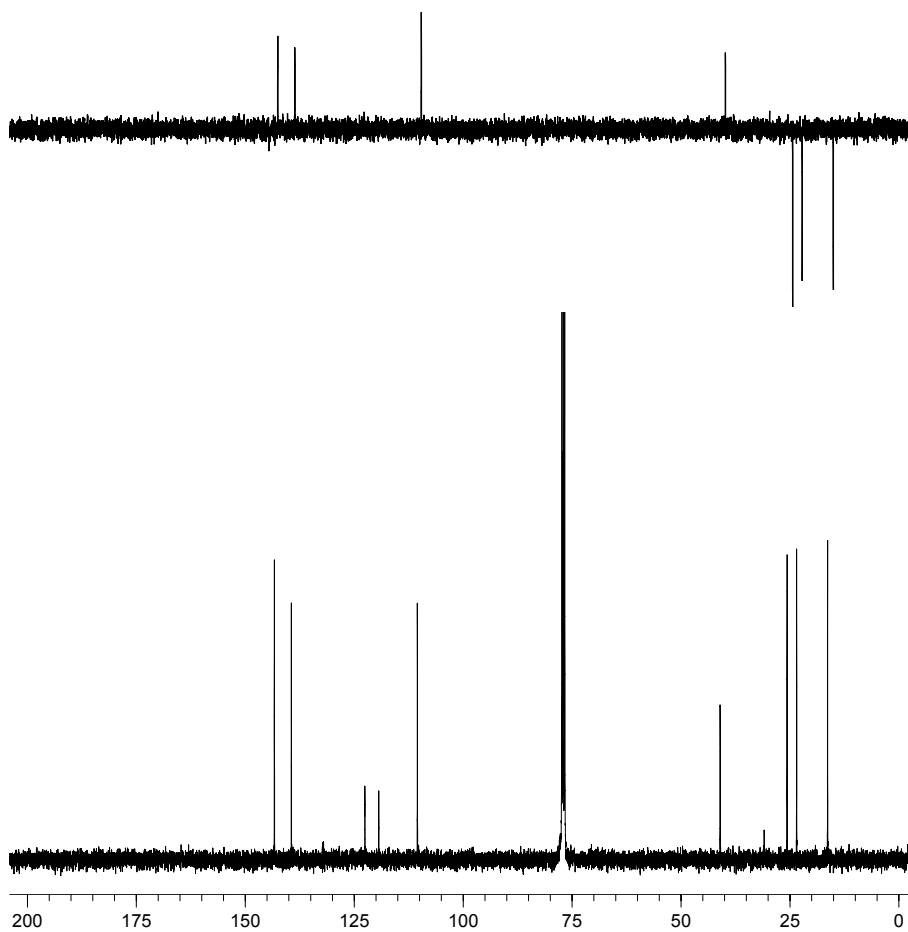

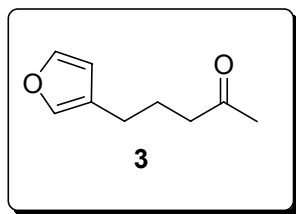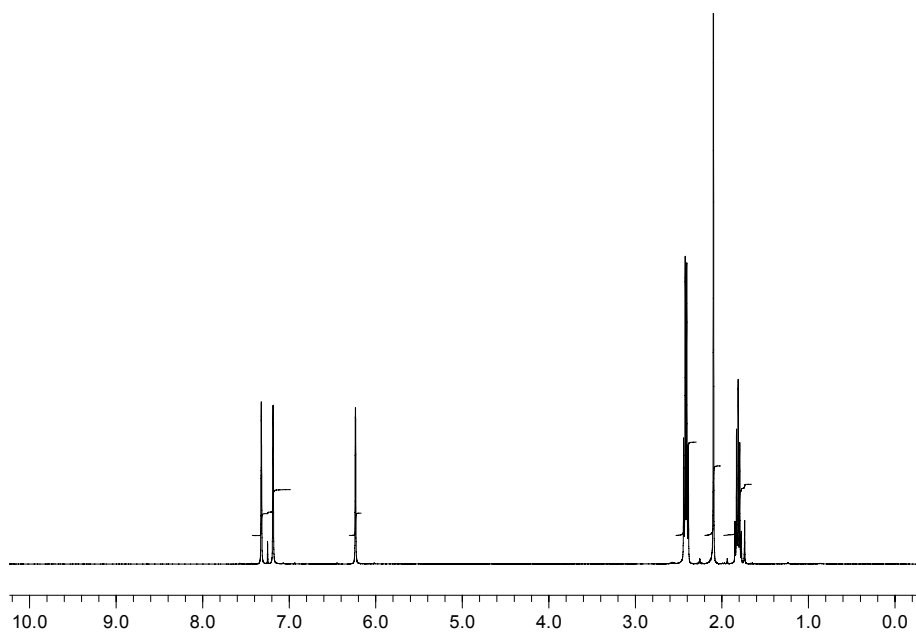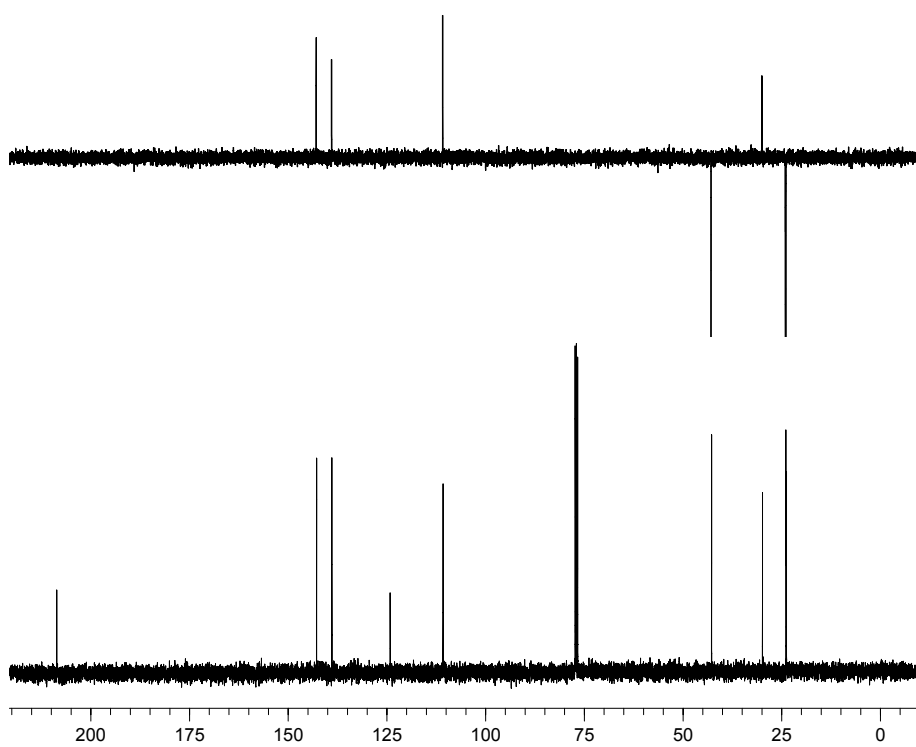

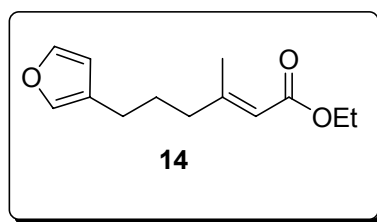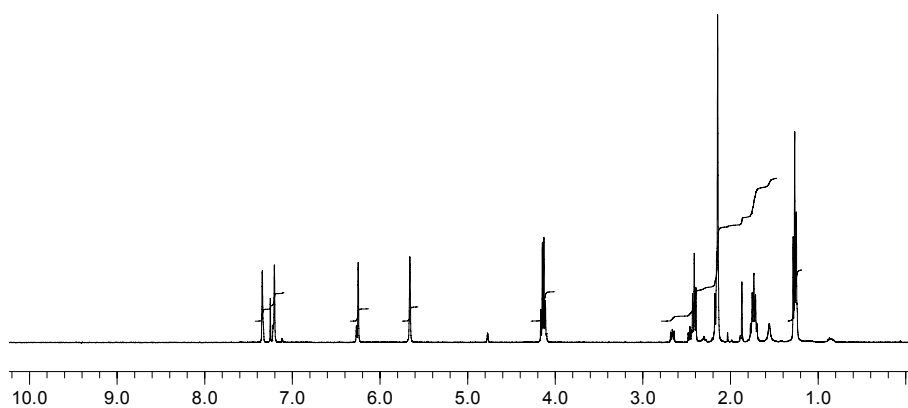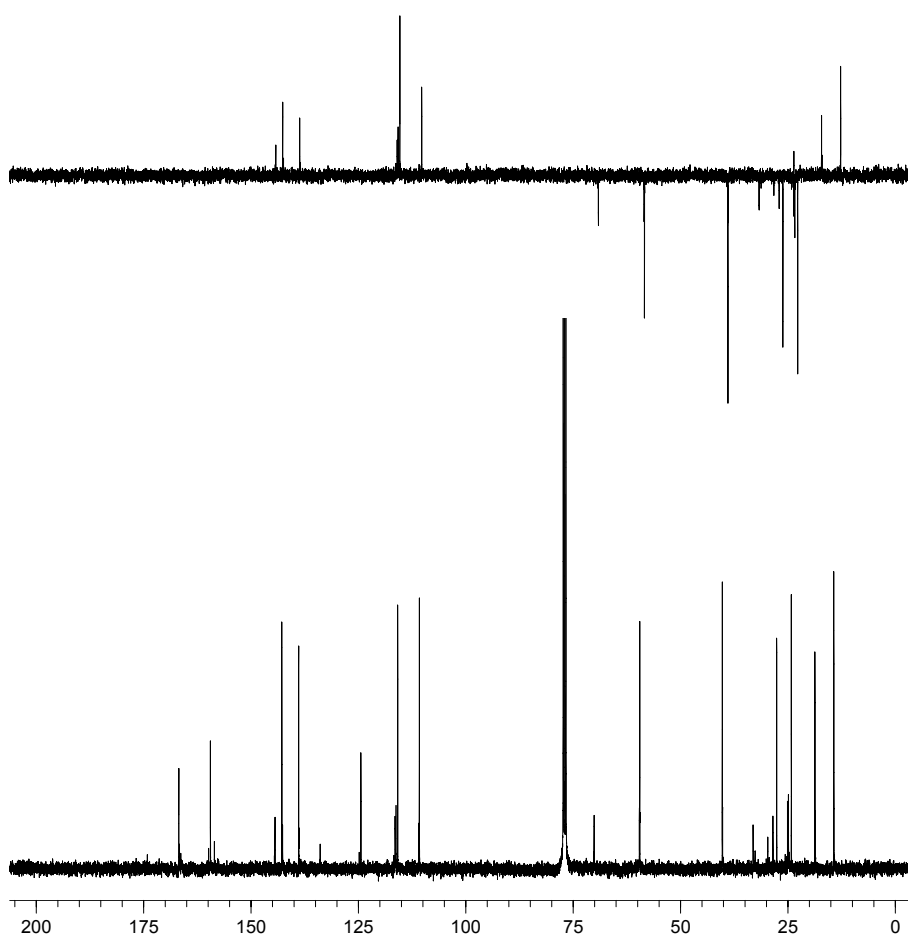



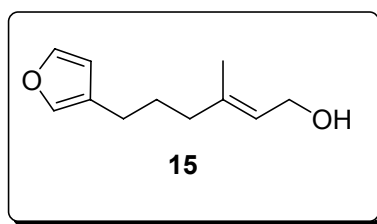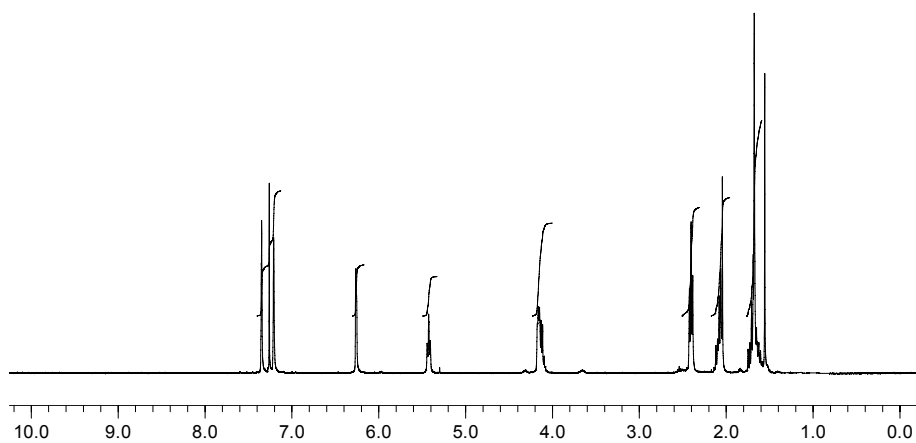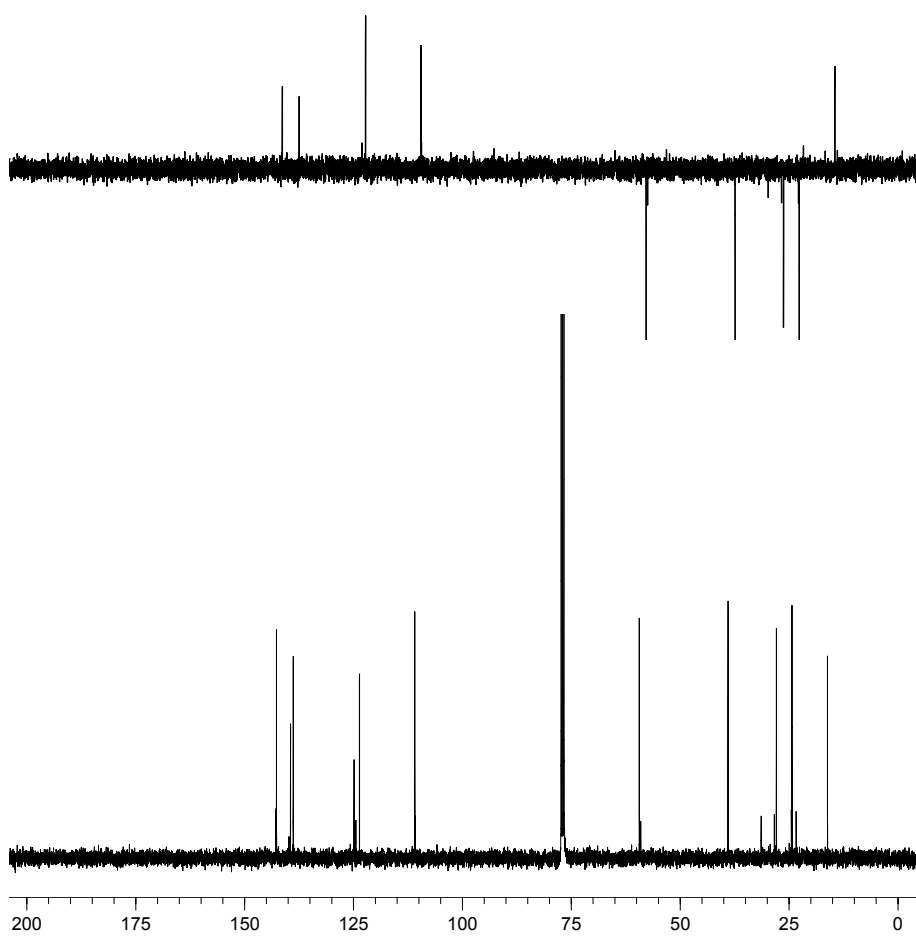

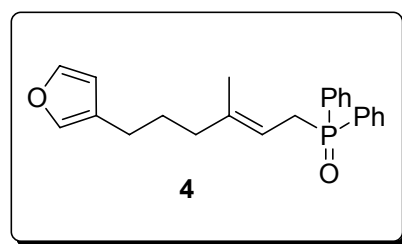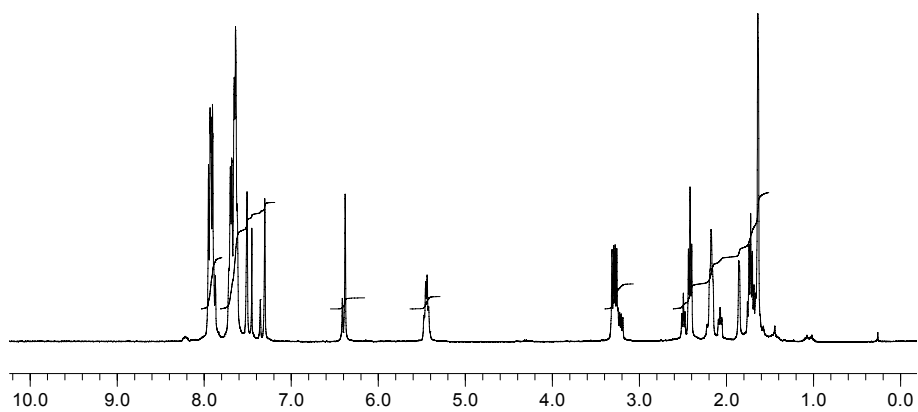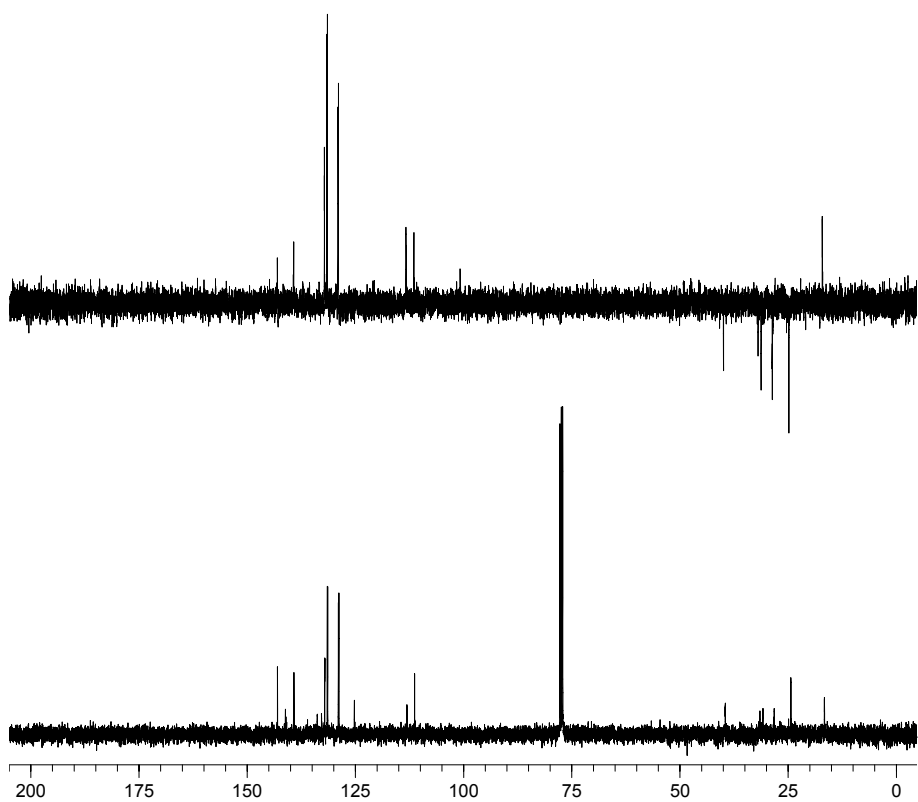

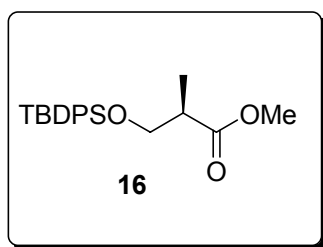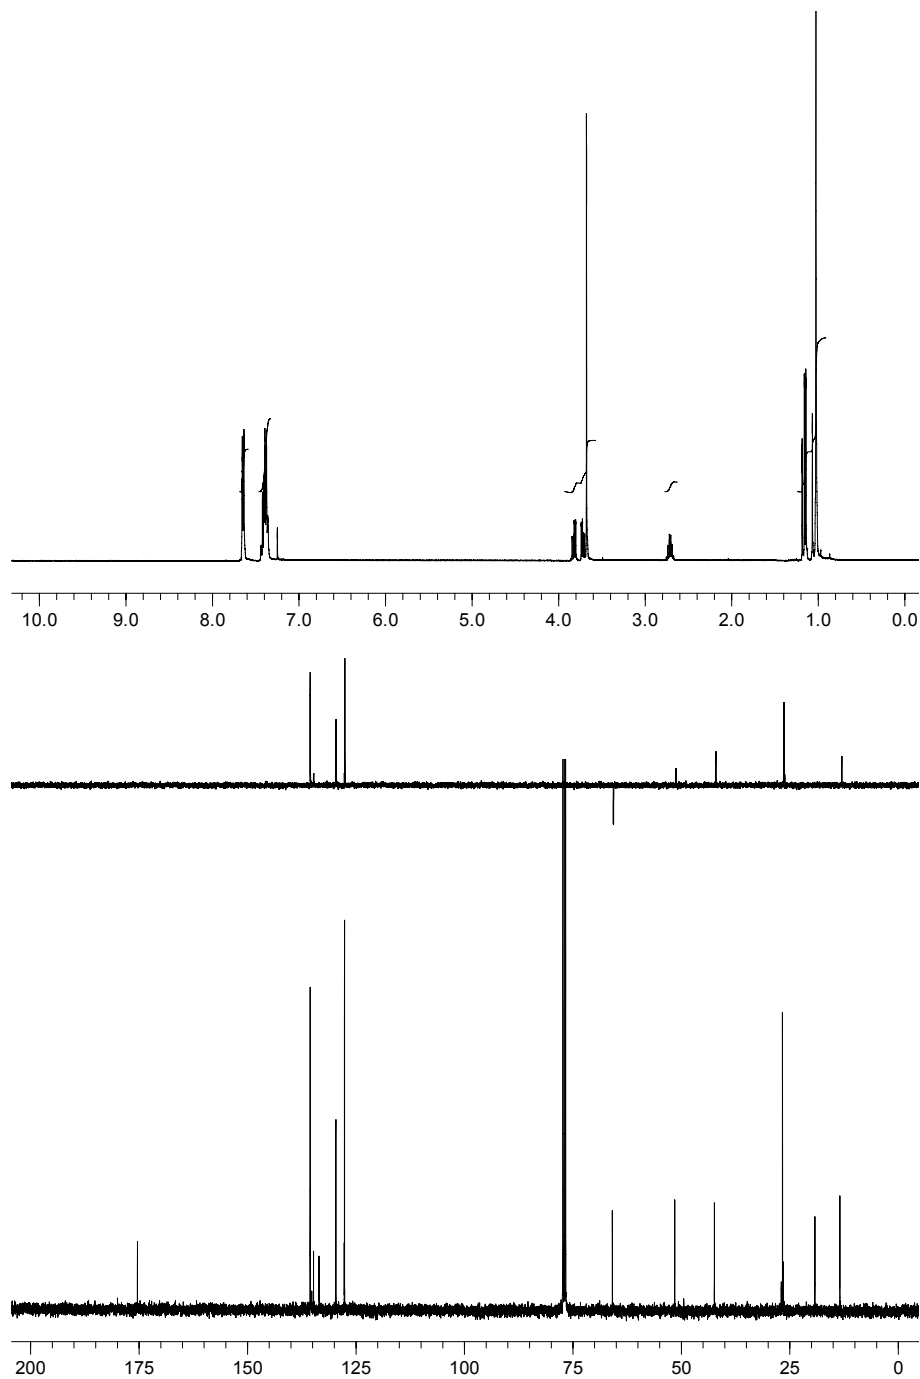

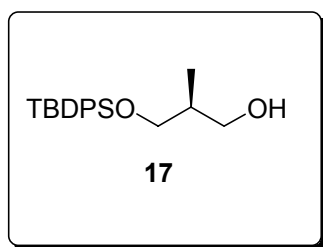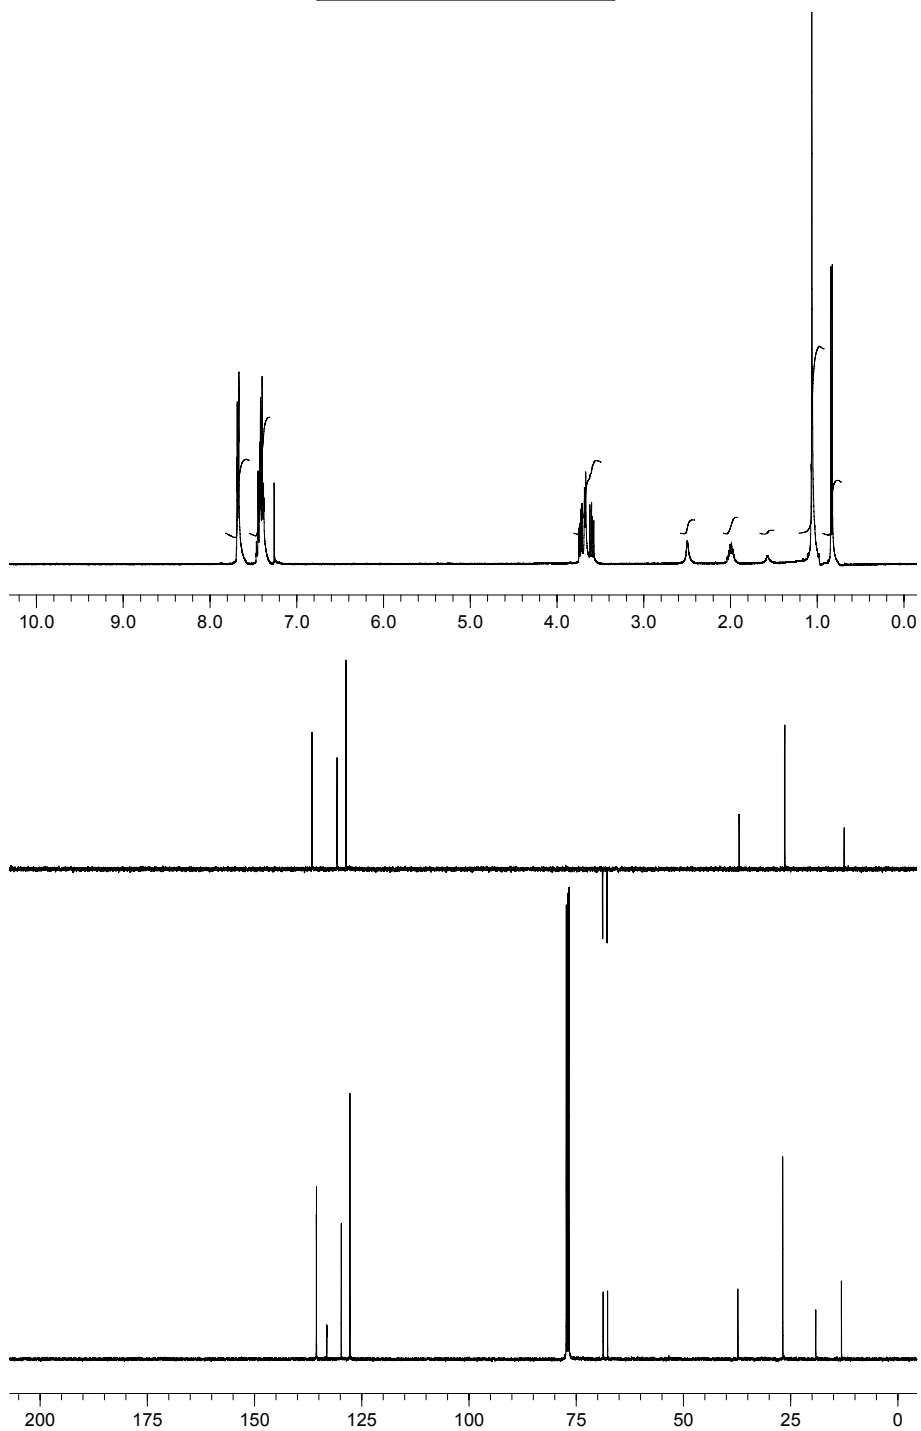

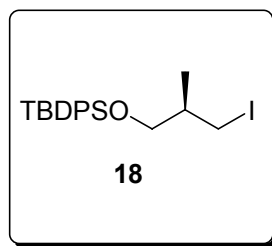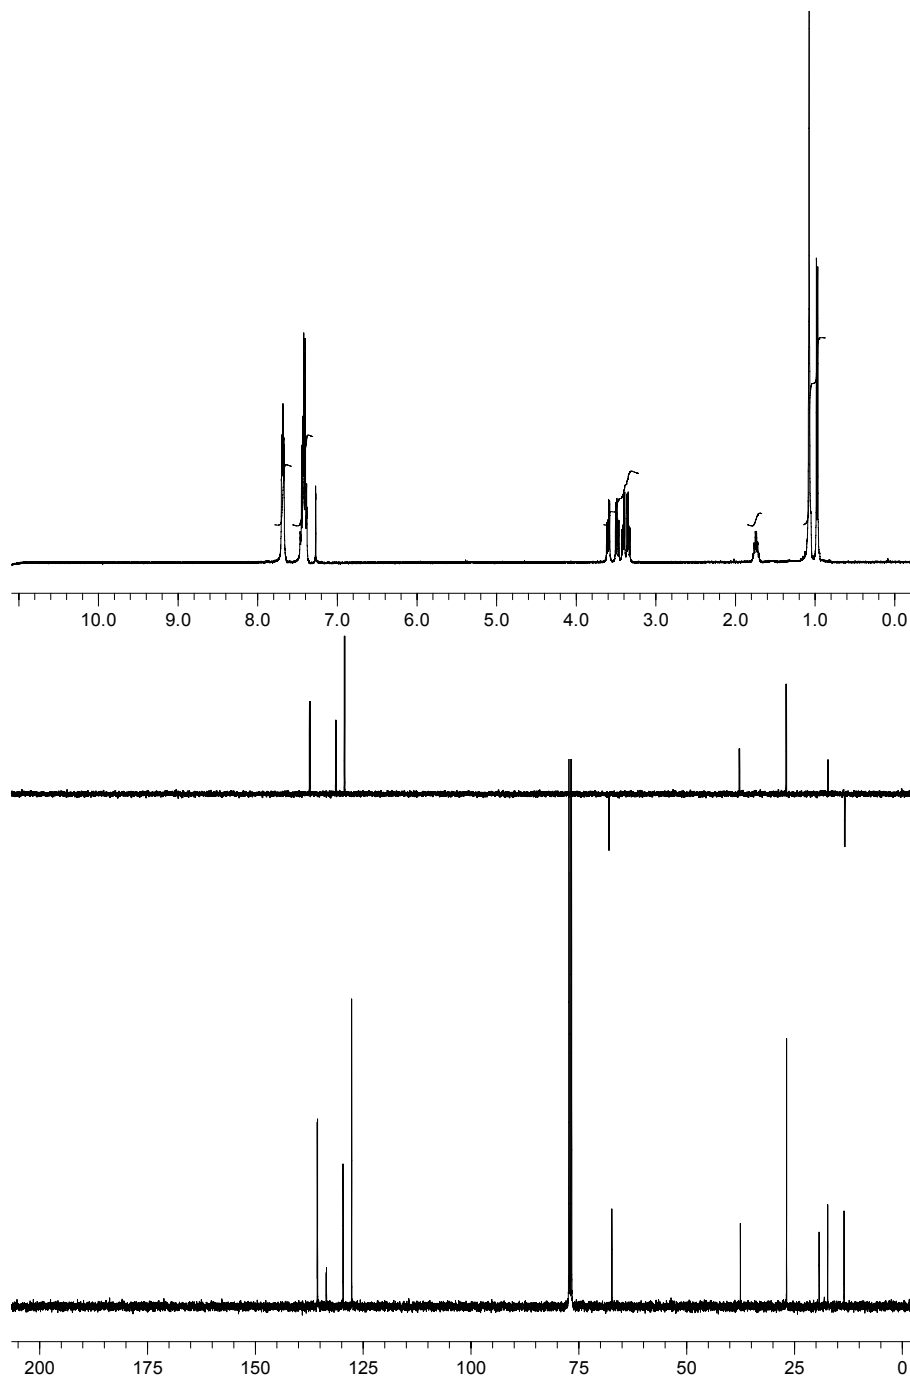

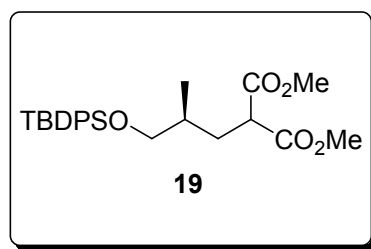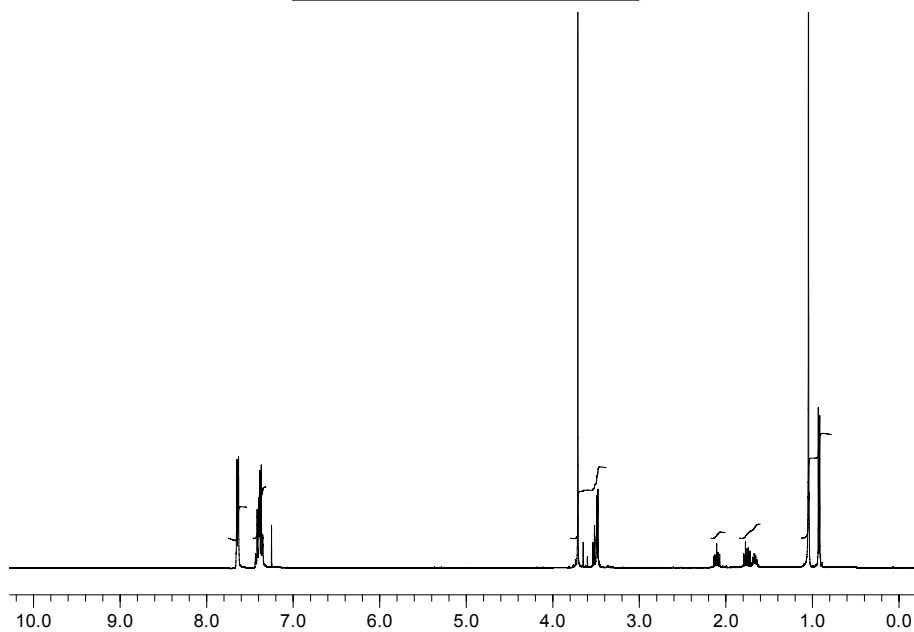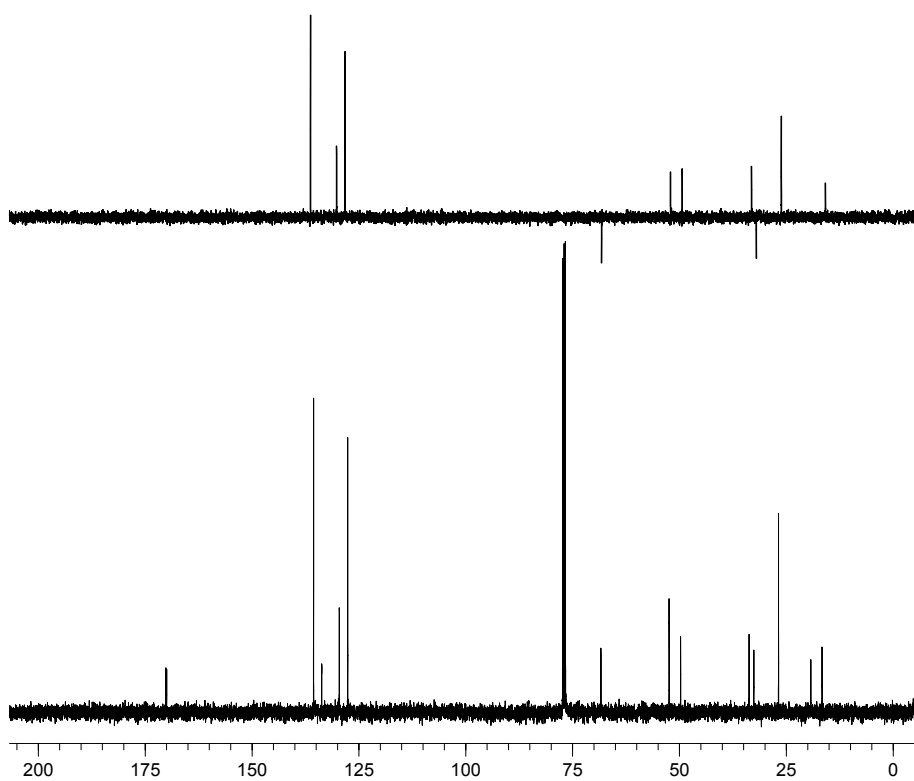

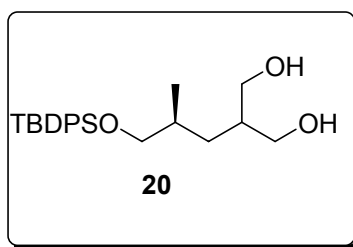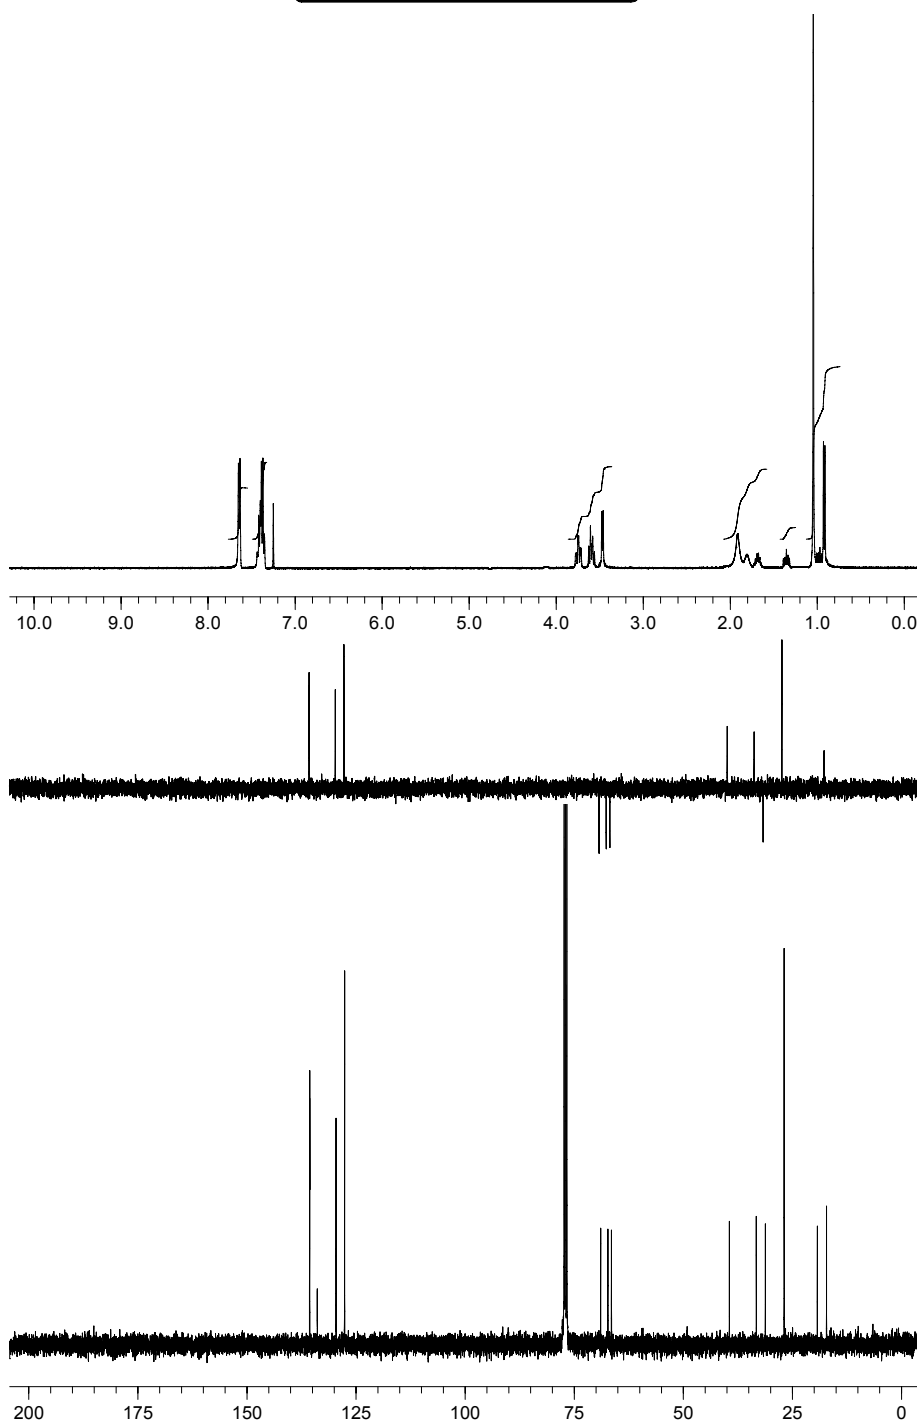

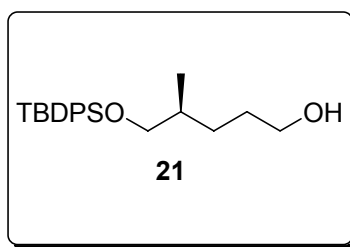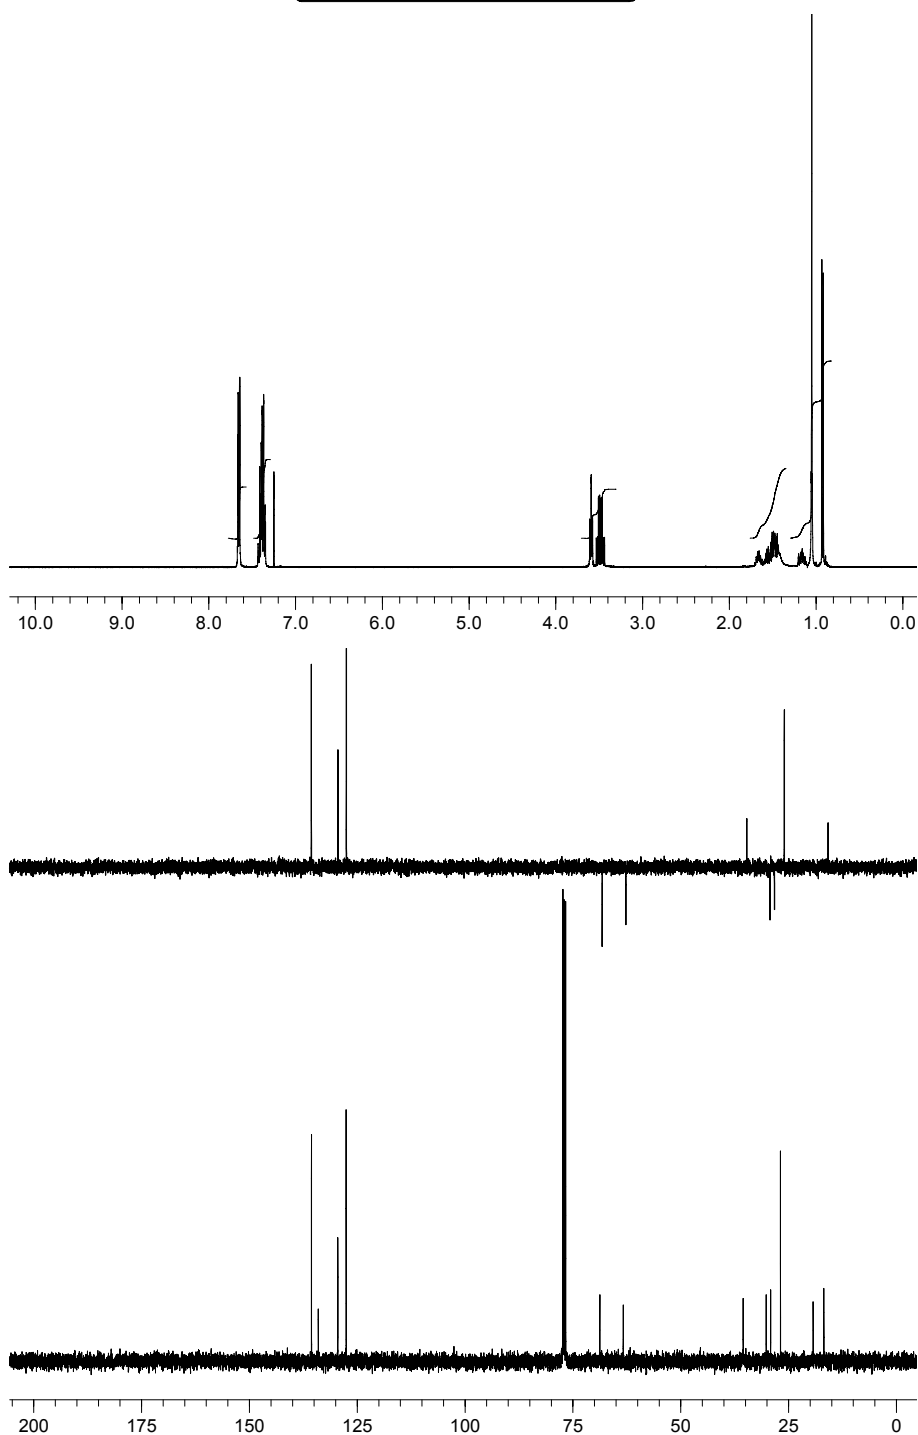



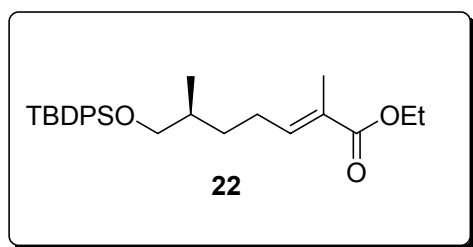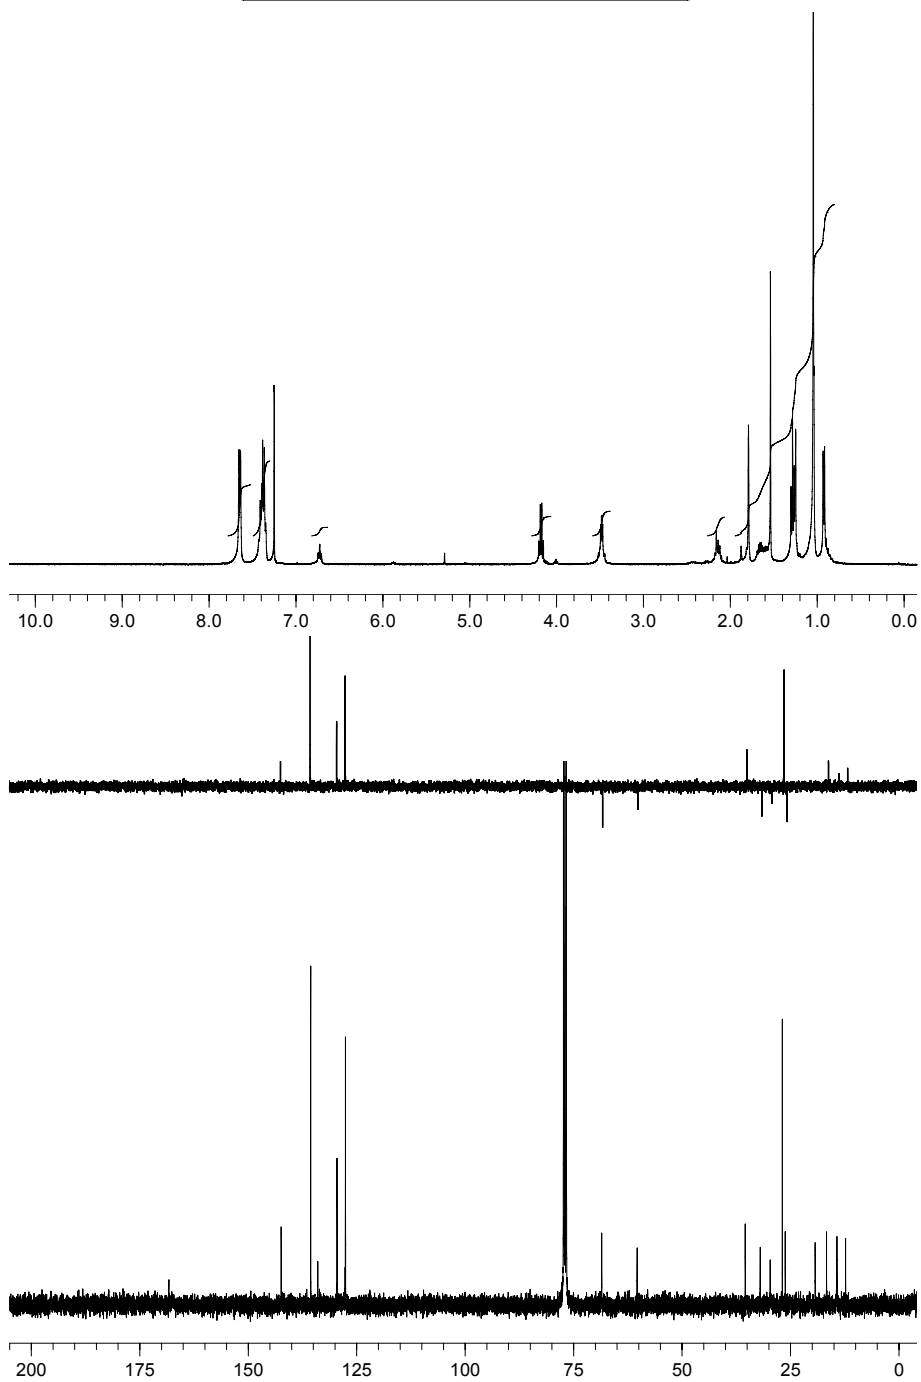

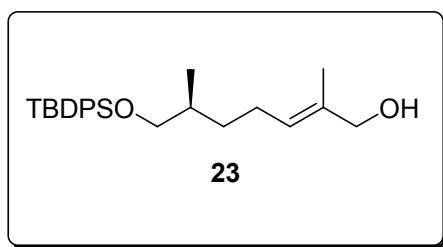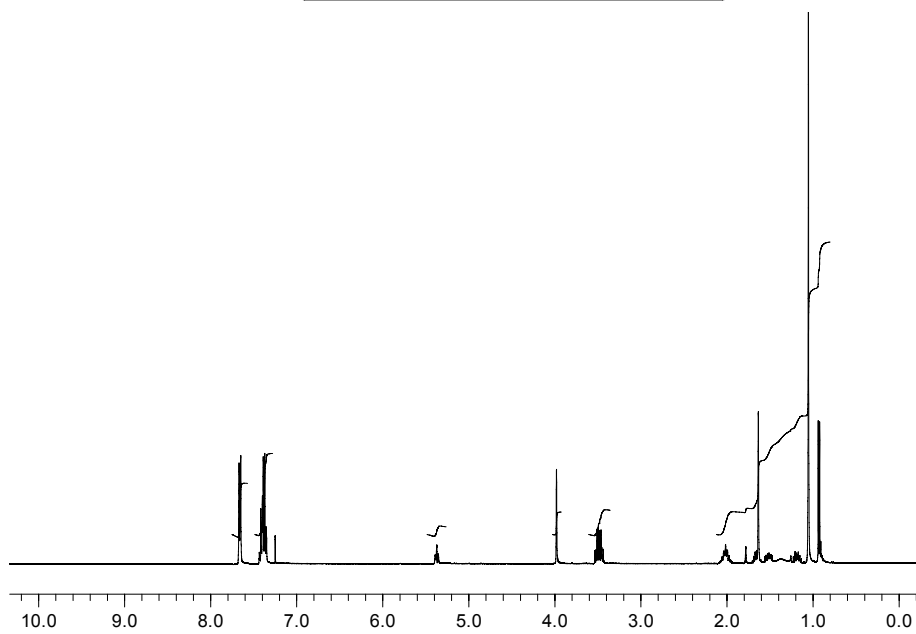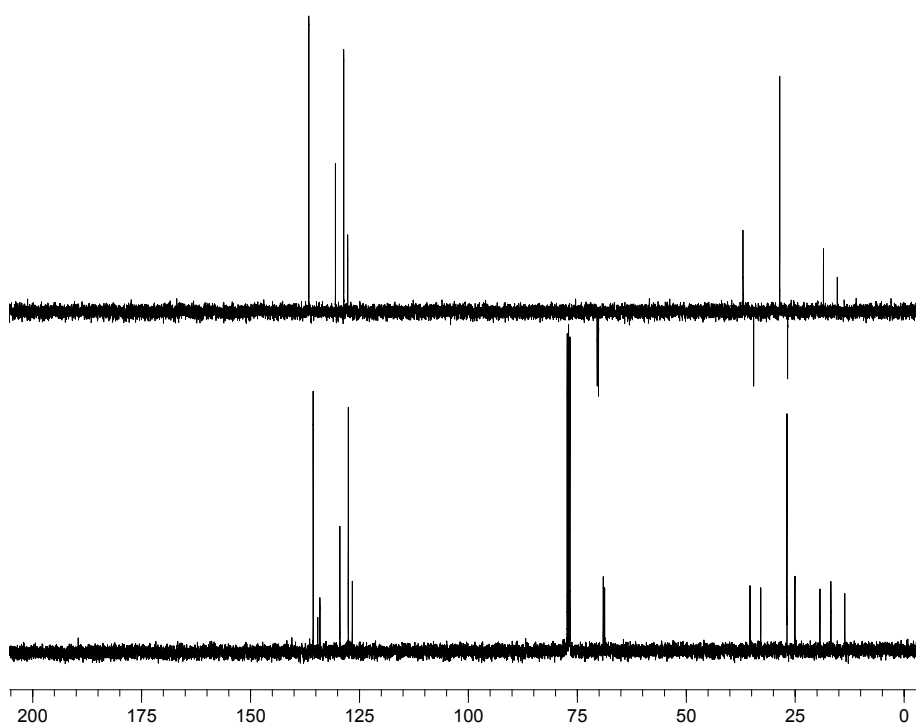

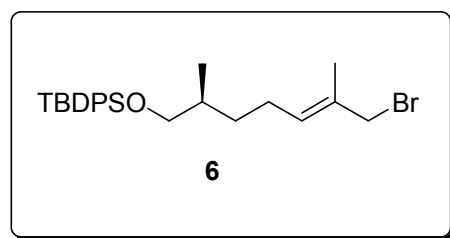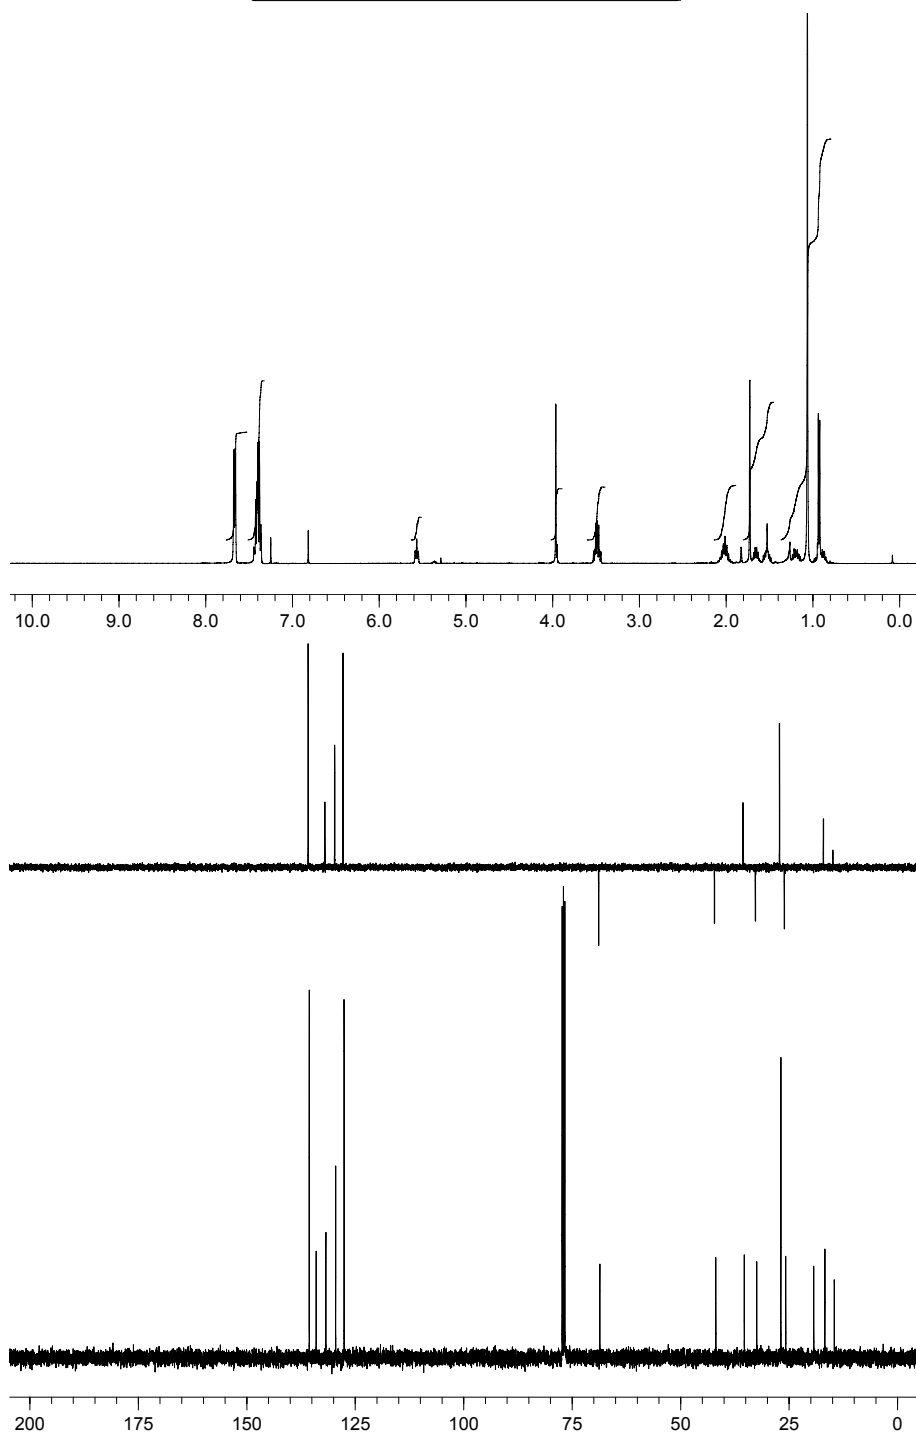

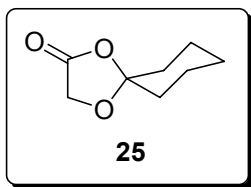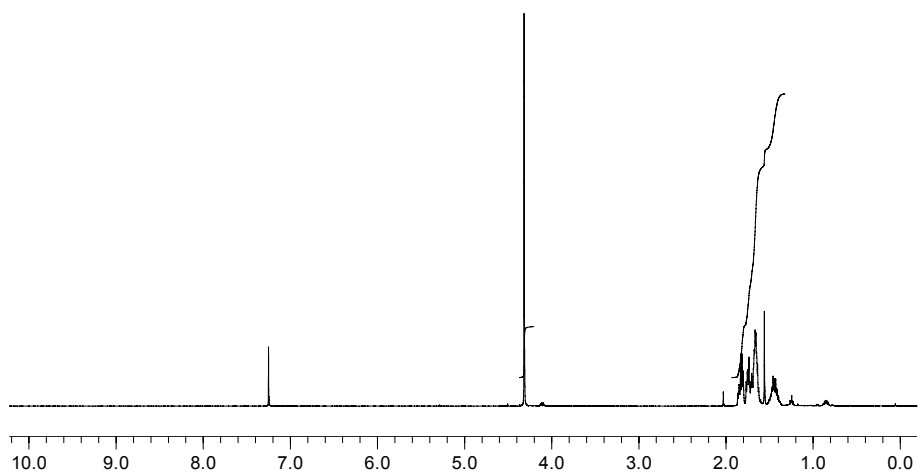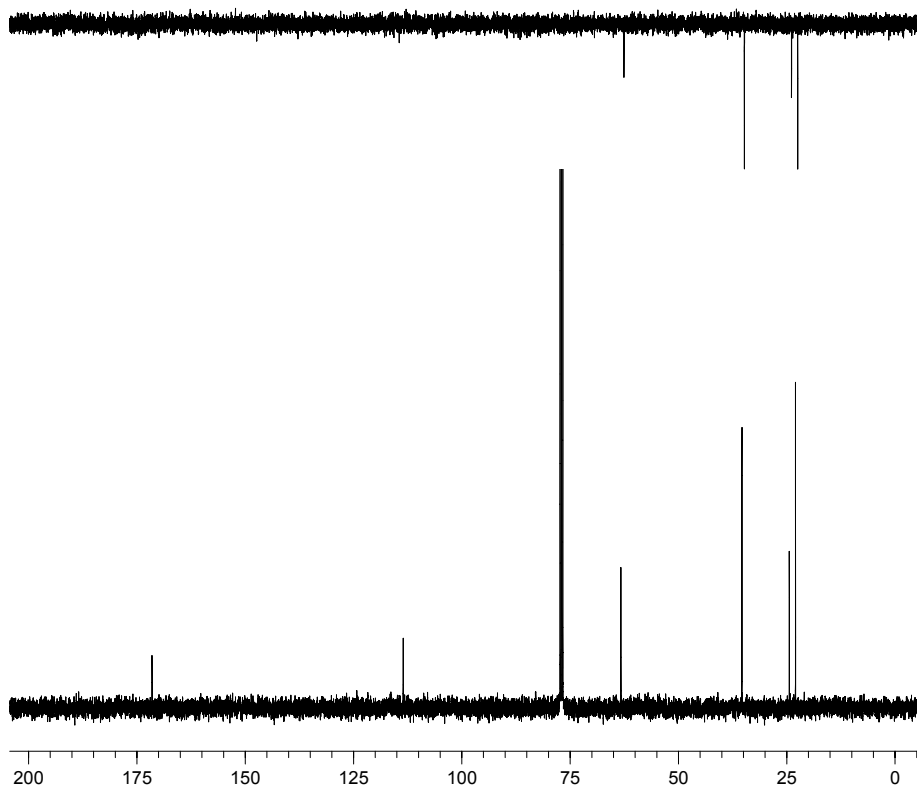

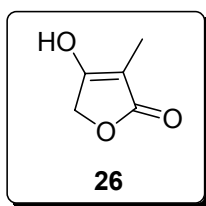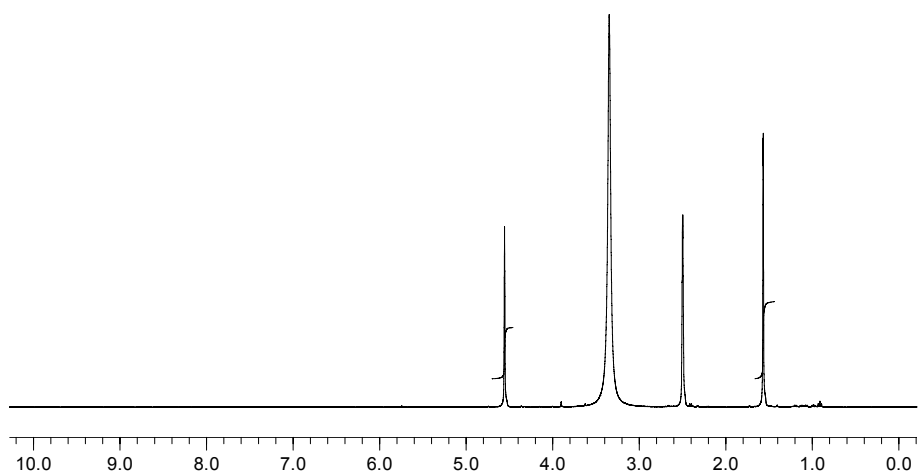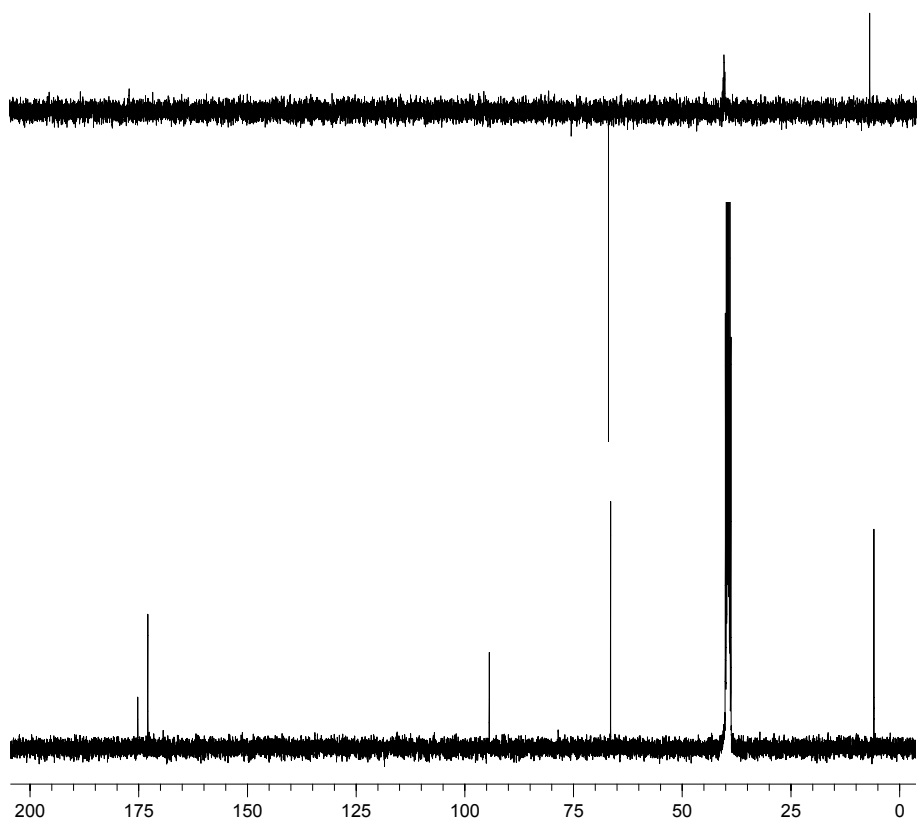

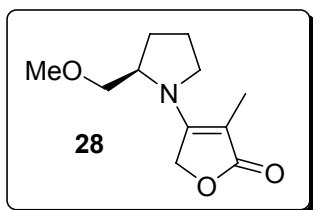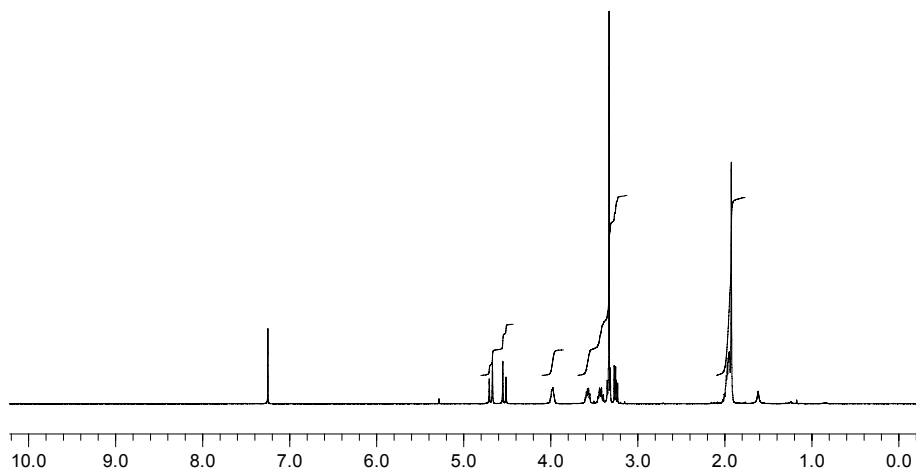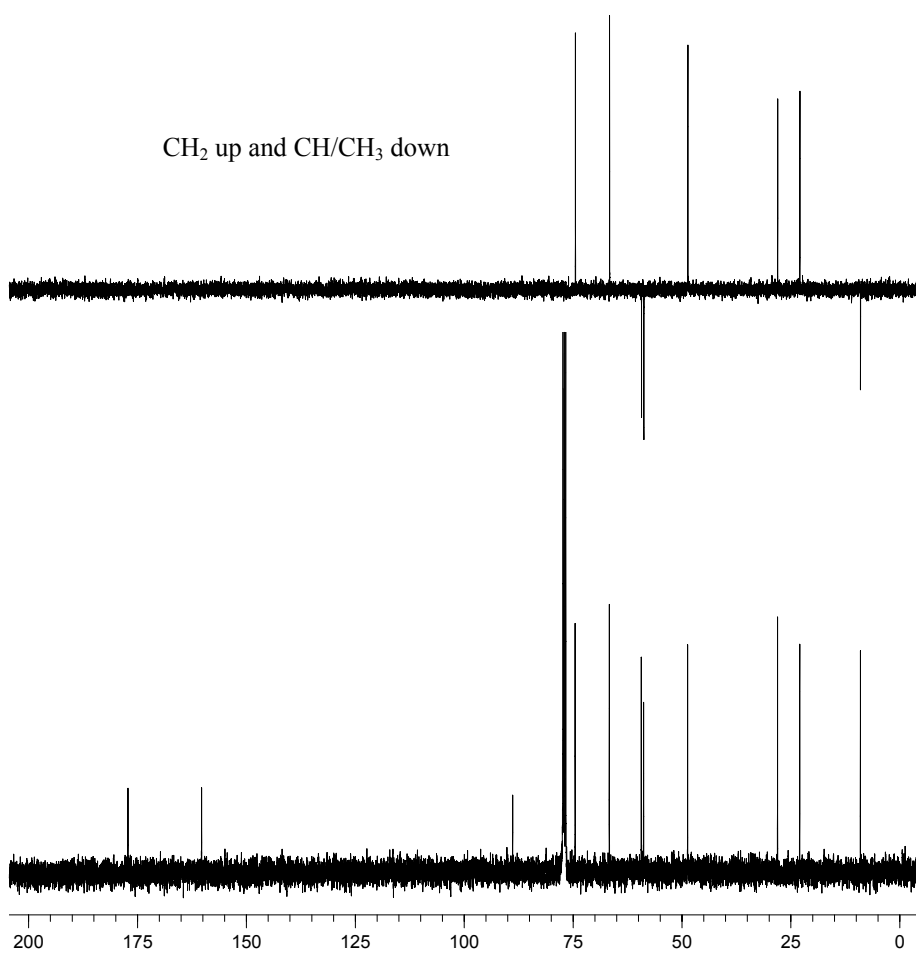

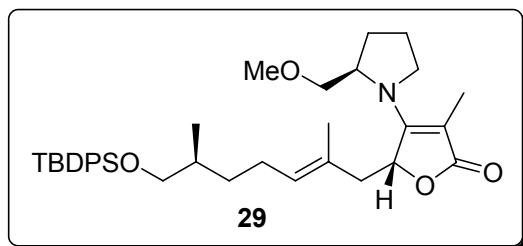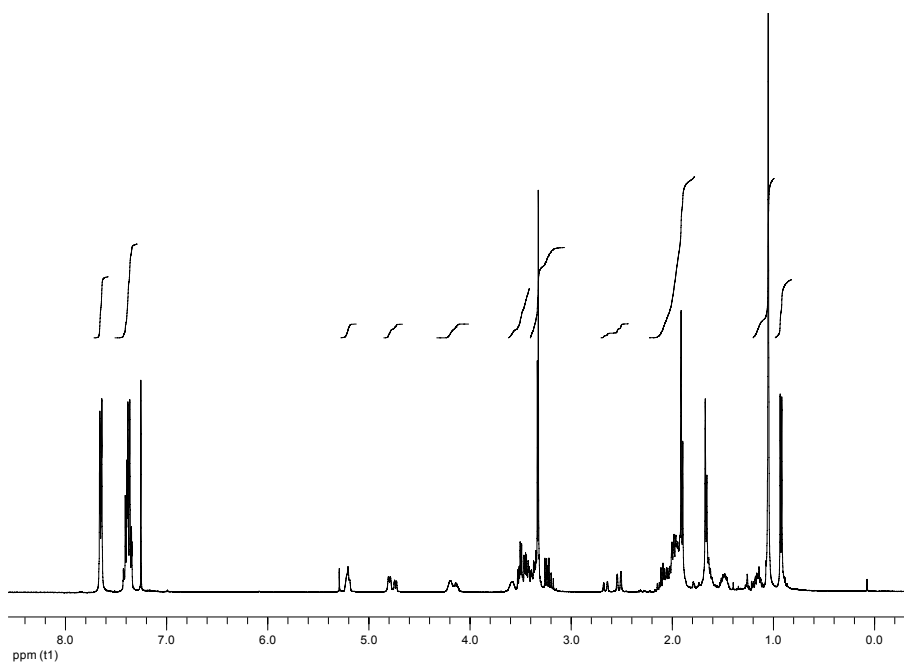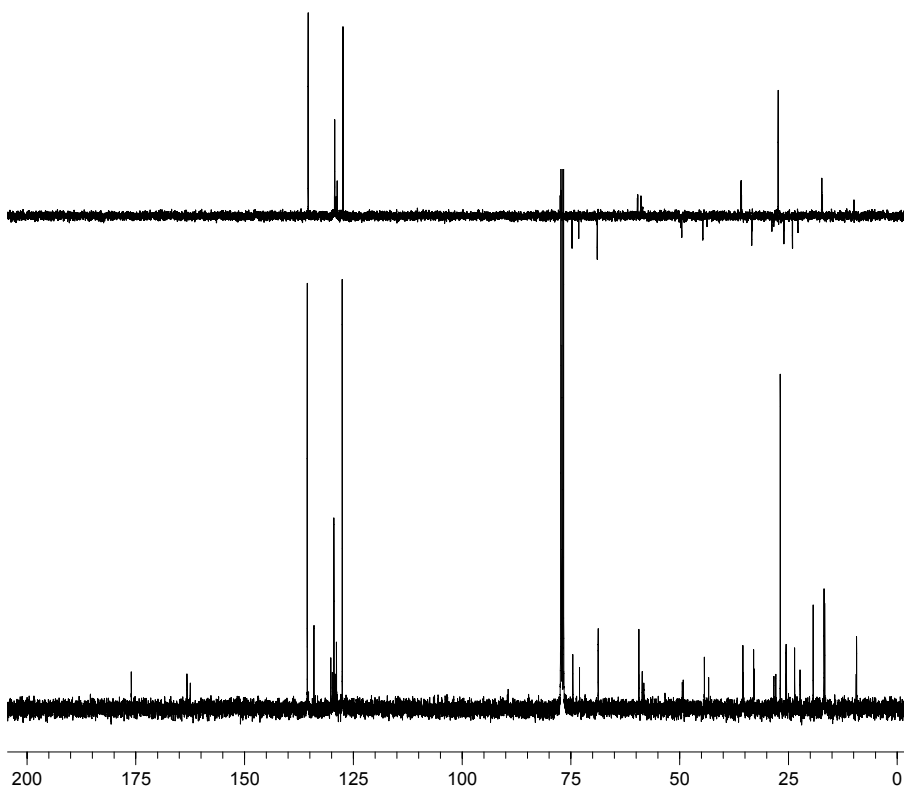

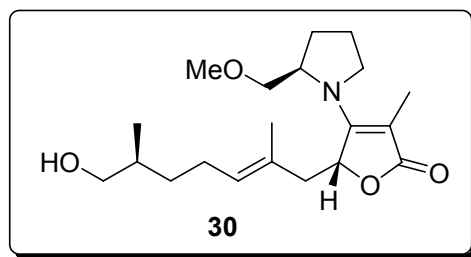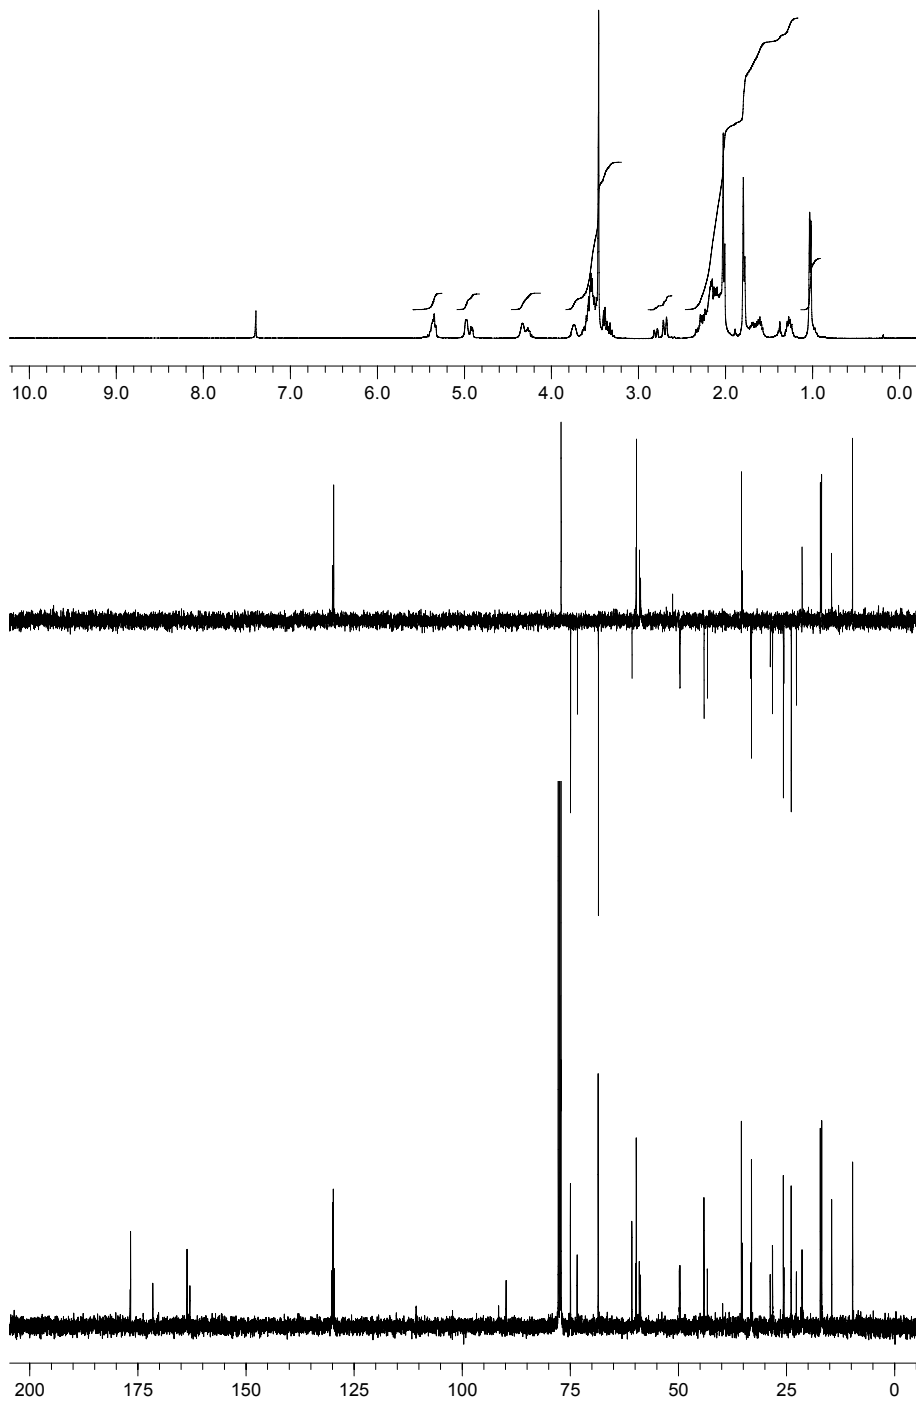



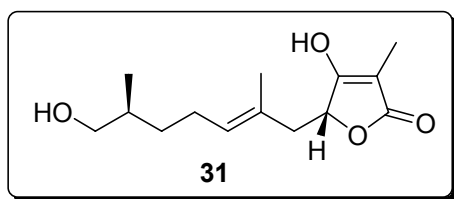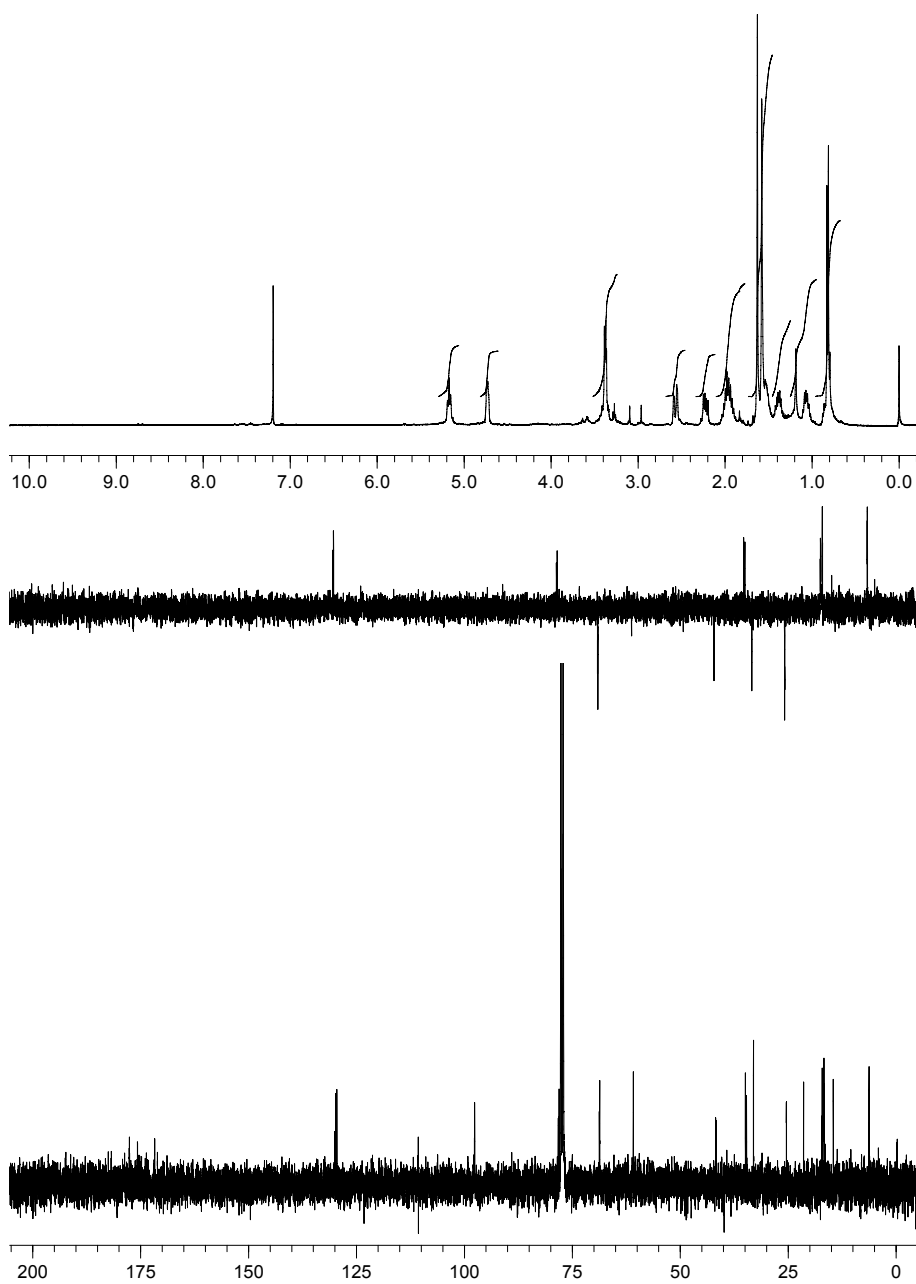

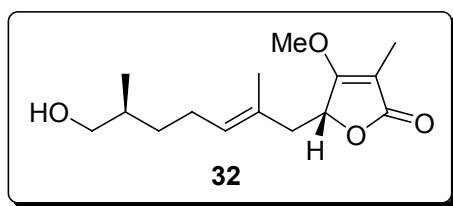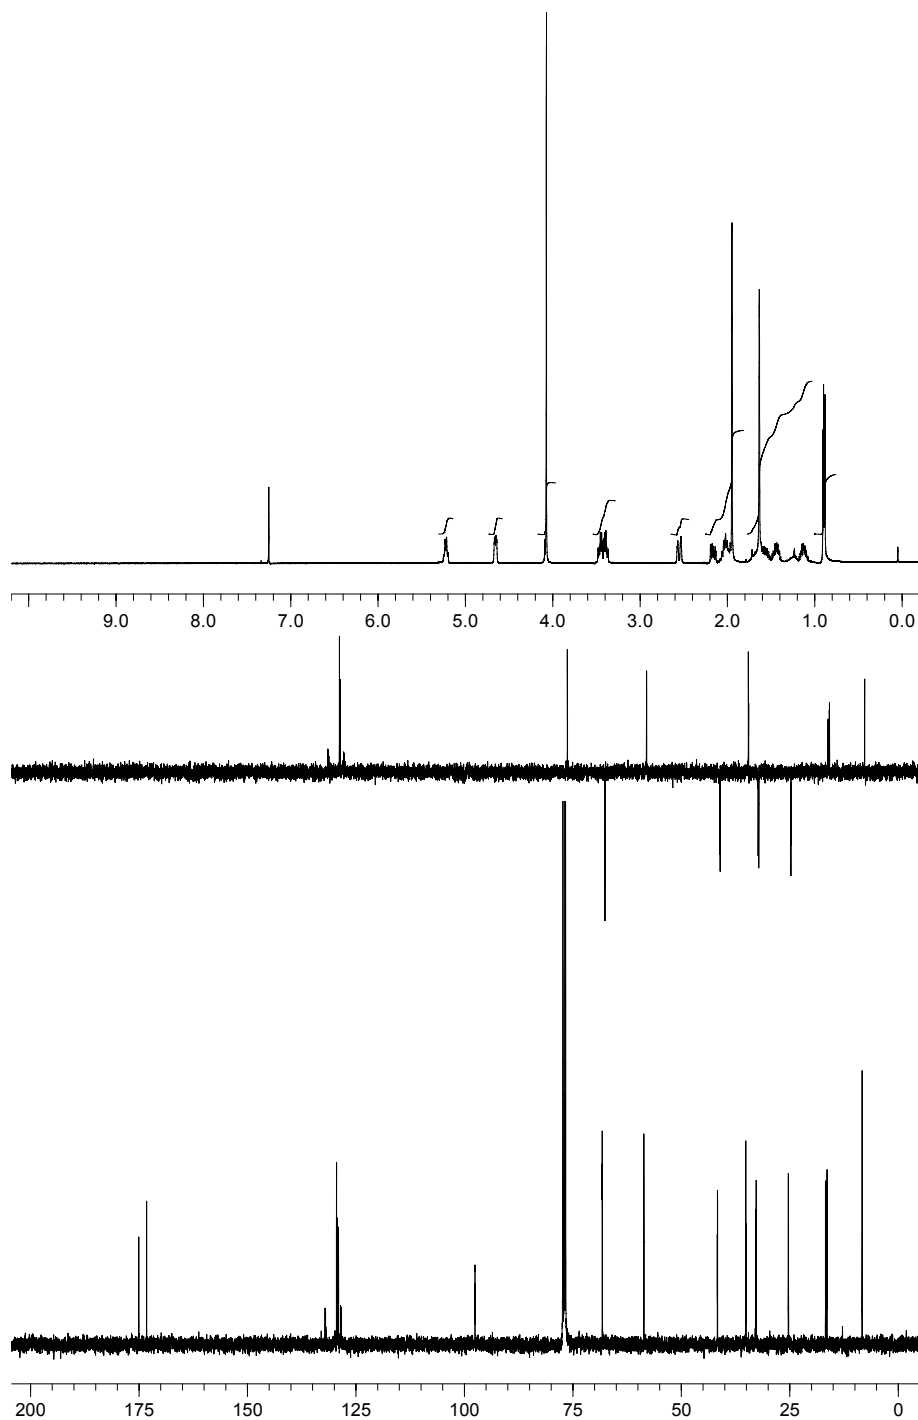

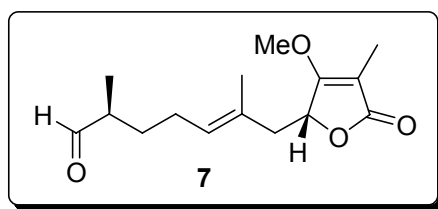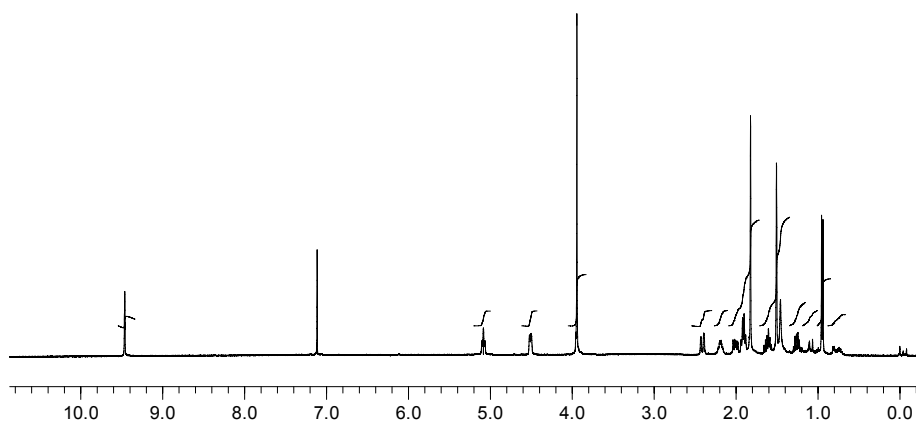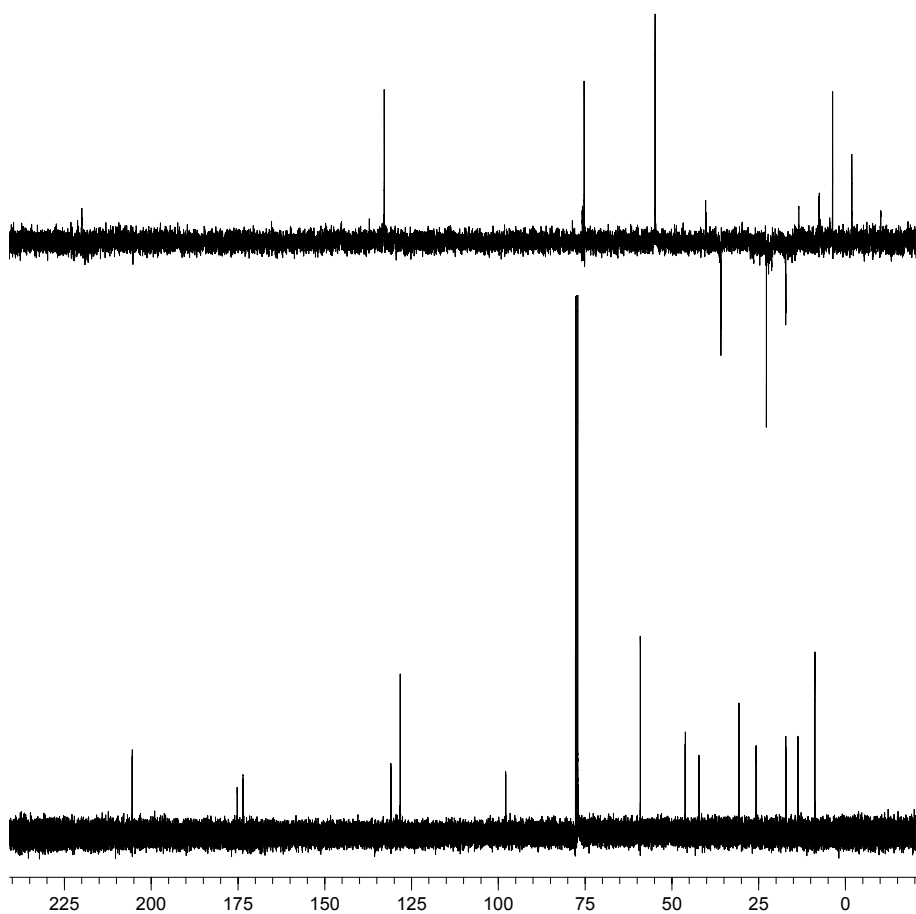

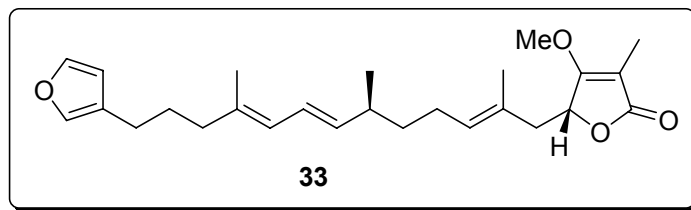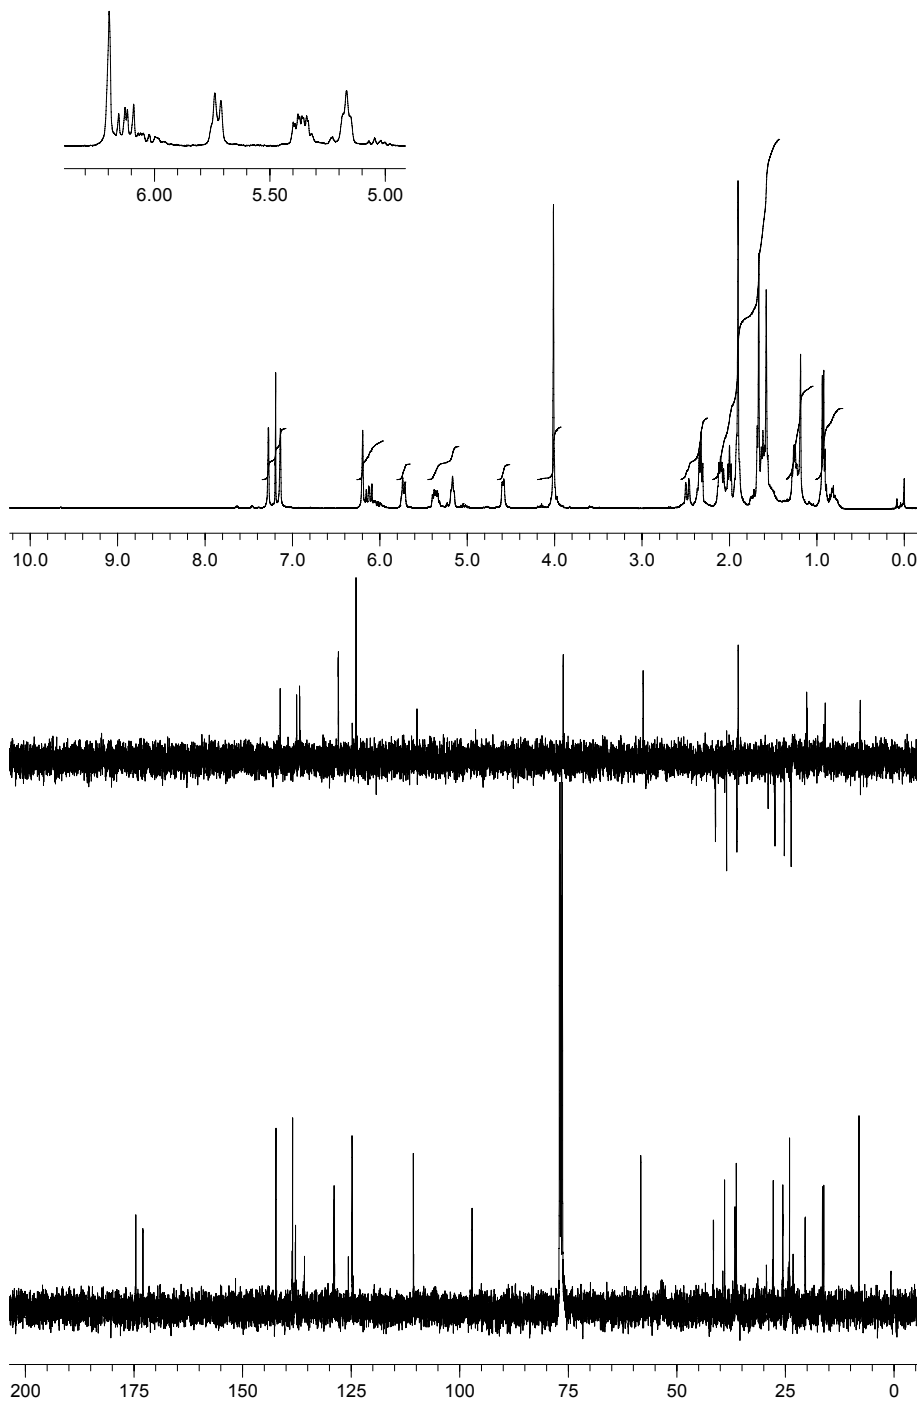

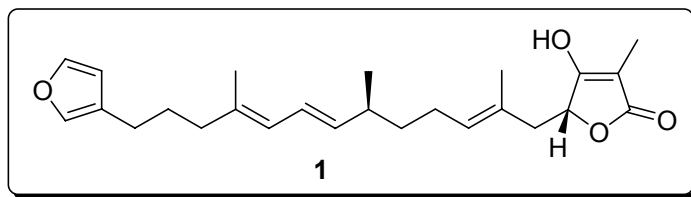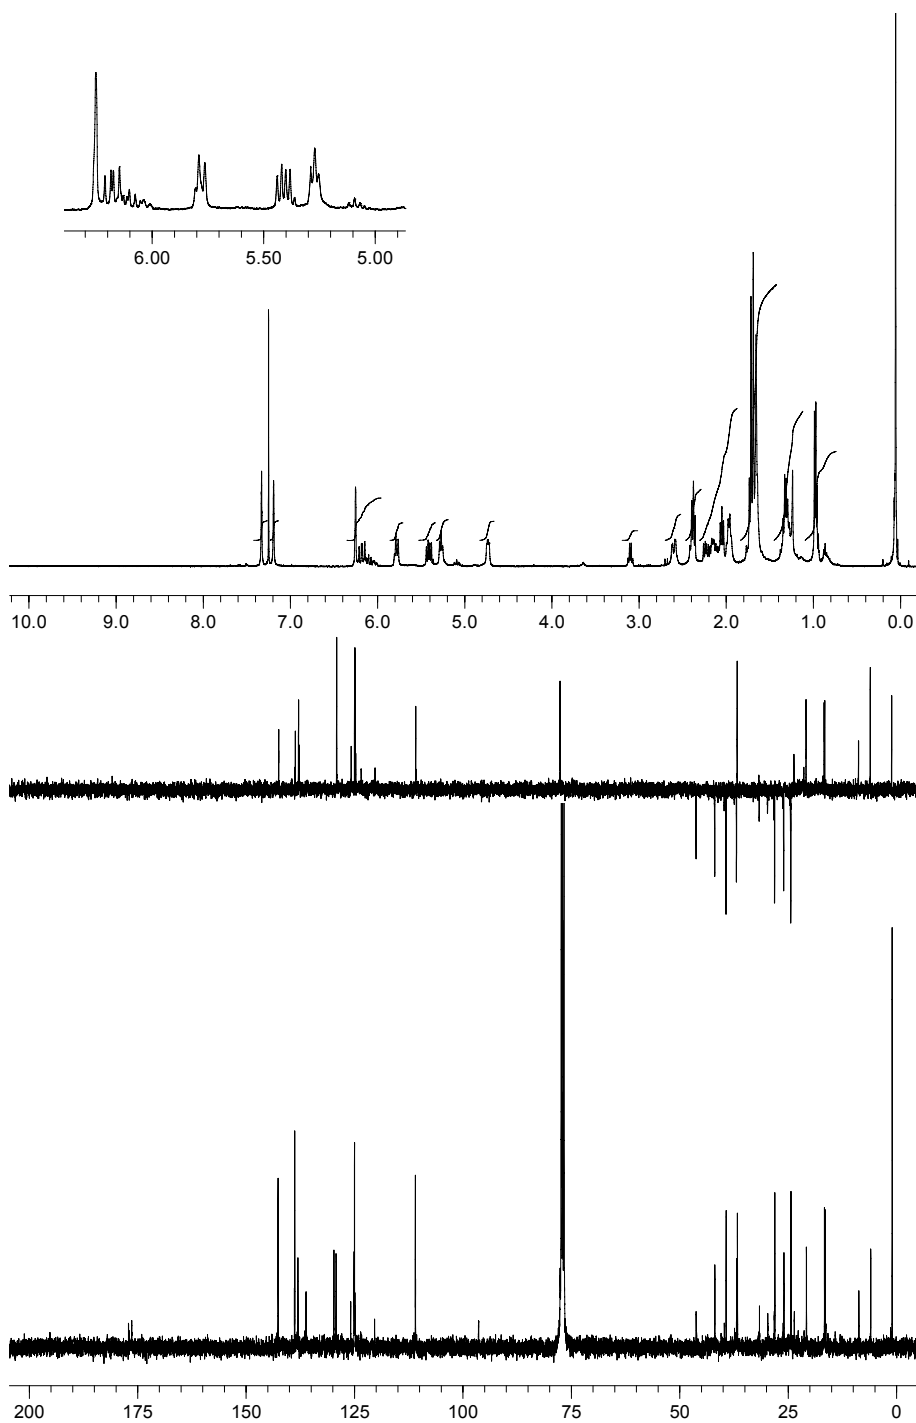

Supplement: b822679b.pdf [file b822679b.pdf]
